# Supplementary material for: Engineering surface hydrophobicity/hydrophilicity of magnetic nanosorbents for efficient multipollutant water remediation
Source: Royal Society of Chemistry journal article supplement (doi:10.1039/d5ra06301a), 2025-01-01
Supplement: d5ra06301a1.pdf [file d5ra06301a1.pdf]

# Engineering Surface Hydrophobicity/Hydrophilicity of Magnetic Nanosorbents for Efficient Multipollutant Water Remediation

Akbar Mobaraki\*<sup>a</sup> Hani Paryabi,<sup>a,b</sup> Mohsen Sheydaei\*<sup>b</sup> and Fariborz Mansouri<sup>c</sup>

<sup>1</sup> Department of Organic and Polymer Chemistry, Faculty of Chemistry, Kharazmi University, P. O. Box: 15719-14911, Tehran, Iran. Email: akbar.mobaraki@khu.ac.ir

<sup>2</sup> Department of Applied Chemistry, Faculty of Chemistry, Kharazmi University, P. O. Box: 15719-14911, Tehran, Iran. Email: Mohsen\_sheydaei@khu.ac.ir

<sup>3</sup> Department of Chemical Technologies, Iranian Research Organization for Science and Technology (IROST), Tehran, Iran. Email: f.mansouri@irost.ir

## Experimental Procedure

### Materials and methods

Ferrous chloride tetrahydrate, ferric chloride hexahydrate, ammonia, tetraethyl orthosilicate (TEOS), trimethoxymethylsilane (TMMS), *N*-[3-(Trimethoxysilyl)propyl]ethylenediamine (TMSPEDA), ethanol, *n*-hexane, methanol, acetonitrile, ethyl acetate, and acetone, with synthesis and analytical grades were provided from Sigma-Aldrich and Merck Co.. Fourier transform infrared (FT-IR) spectra were acquired using a FT-IR spectrometer (Perkin-Elmer Spectrum RXI) at room temperature, with KBr discs. Transmission electron microscopy (TEM) images were captured by Philips EM 208S equipment. The X-ray diffraction (XRD) patterns were analyzed using a Philips PW1730 X-Ray Diffractometer equipped with Cu-K $\alpha$  radiation. An Energy dispersive X-ray (EDX) analysis was carried out utilizing a TESCAN MIRA III analyzer, which is an environmental scanning electron microscope. The vibrating sample magnetometer (VSM) was utilized to calculate the magnetization curve of the magnetic samples by applying a 15 kOe magnetic field at room temperature. The thermal stability of the magnetic sorbents was examined by SDT Q600 V20.9 Build 20 Thermo-gravimetric Analyzer (TGA) in the temperature range of 0 to 800 °C. The MIRA III - TESCAN device was used to conduct Field Emission Scanning Electron Microscopy (FESEM). Elemental analyses for C, N, and H

were performed using a Perkin-Elmer 2400 II analyzer. The N<sub>2</sub>-sorptions were carried out in a Belsorp-mini-BEL Japan, Inc. at 298 K. An Avaspec-2048-TEC UV-Vis spectrophotometer was used to evaluate the chromium (VI) removal efficiency.

### **Preparation of the magnetic sorbents and their characterizations**

The preparation of Fe<sub>3</sub>O<sub>4</sub> MNPs was accomplished via methods reported in the literature [33]. In this experiment, 4.0 g (20.1 mmol) of Iron(II) chloride tetrahydrate (FeCl<sub>2</sub>·4H<sub>2</sub>O) and 11.0 g (40.7 mmol) of Iron(III) chloride hexahydrate (FeCl<sub>3</sub>·6H<sub>2</sub>O) were dissolved in 250 mL of distilled water. The dissolution process took place under a nitrogen environment with a mechanical stirrer at a temperature of 85 °C. The solution's pH was modified to reach 9-11 using a 25% aqueous solution of NH<sub>3</sub>. After undergoing continuous agitation for duration of 4 h, magnetite nanoparticles (Fe<sub>3</sub>O<sub>4</sub>) were generated as a result of precipitation. The black deposited solid was rinsed multiple times with distilled water and then gathered using an external magnet. The silica-coated magnetic nanoparticles were synthesized by ultrasonically pre-mixing a dispersion of 2.0 g of Fe<sub>3</sub>O<sub>4</sub> black precipitate in 400 mL of ethanol for about 30 min at 25 °C. Afterward, 12 mL of aqueous solution of NH<sub>3</sub> (25%) and TEOS (4.0 mL) were sequentially and gradually introduced at the same temperature. The solution obtained was agitated mechanically for a continuous period of 24 h at a temperature of 25 °C. Following this, the Fe<sub>3</sub>O<sub>4</sub>@SiO<sub>2</sub> products were gathered using an ordinary magnet, rinsed multiple times with ethanol, and left to dry using vacuum at room temperature for the entire night. Ultimately, the process of modifying the surface of Fe<sub>3</sub>O<sub>4</sub>@SiO<sub>2</sub> core-shell MNPs with methyl group required a synthetic technique that utilized the grafting of trimethoxy(methyl)silane (TMMS) onto the Fe<sub>3</sub>O<sub>4</sub>@SiO<sub>2</sub> core-shell MNPs. To achieve this objective, 0.4 g of TMMS (2.94 mmol) was introduced into 35 mL of anhydrous toluene that already contained Fe<sub>3</sub>O<sub>4</sub>@SiO<sub>2</sub> core-shell MNPs (1.0 g). The mixture was then agitated for 24 h under reflux conditions. The magnetic sample obtained was rinsed multiple times with toluene and ethanol. The appropriate magnetic Fe<sub>3</sub>O<sub>4</sub>-SiO<sub>2</sub>@Me sorbent was obtained by drying it overnight at ambient temperature under vacuum (denoted as Mag@Me). The same procedure was employed for the synthesis of Fe<sub>3</sub>O<sub>4</sub>@SiO<sub>2</sub>@N1M3 (denoted as Mag@N1M3) in which Fe<sub>3</sub>O<sub>4</sub>@SiO<sub>2</sub> functionalized with both TMMS and *N*-[3-(Trimethoxysilyl)propyl]ethylenediamine (TMSPEDA) with molar ratio of 3:1. Also the

procedure was applied for the synthesis of  $\text{Fe}_3\text{O}_4@\text{SiO}_2@\text{N1M1}$  (denoted as  $\text{Mag@N1M1}$ ) in which  $\text{Fe}_3\text{O}_4@\text{SiO}_2$  was anchored with equal molar ratio (1:1) of both TMMS and TMSPEDA.

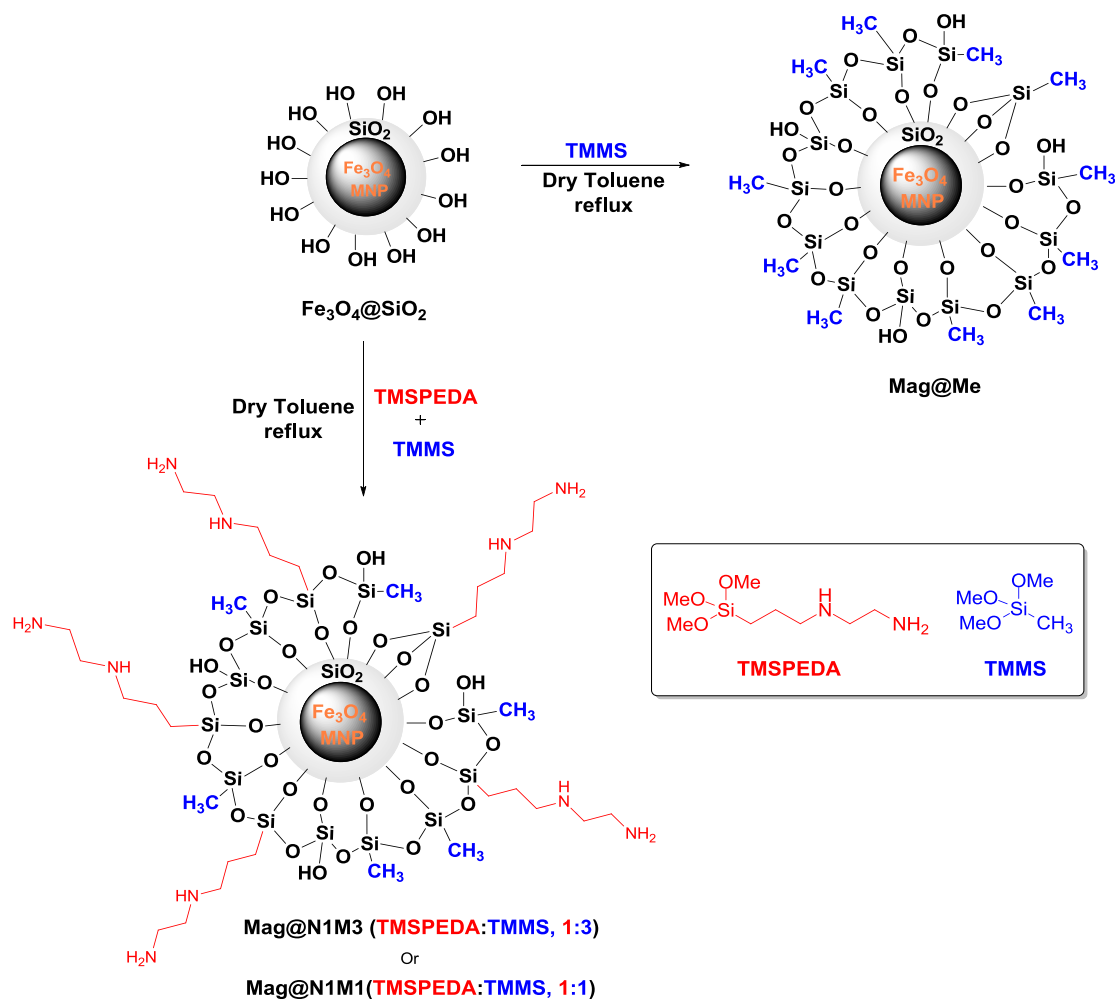

Scheme S1. Synthetic route for  $\text{Mag@Me}$ ,  $\text{Mag@N1M3}$  and  $\text{Mag@N1M1}$

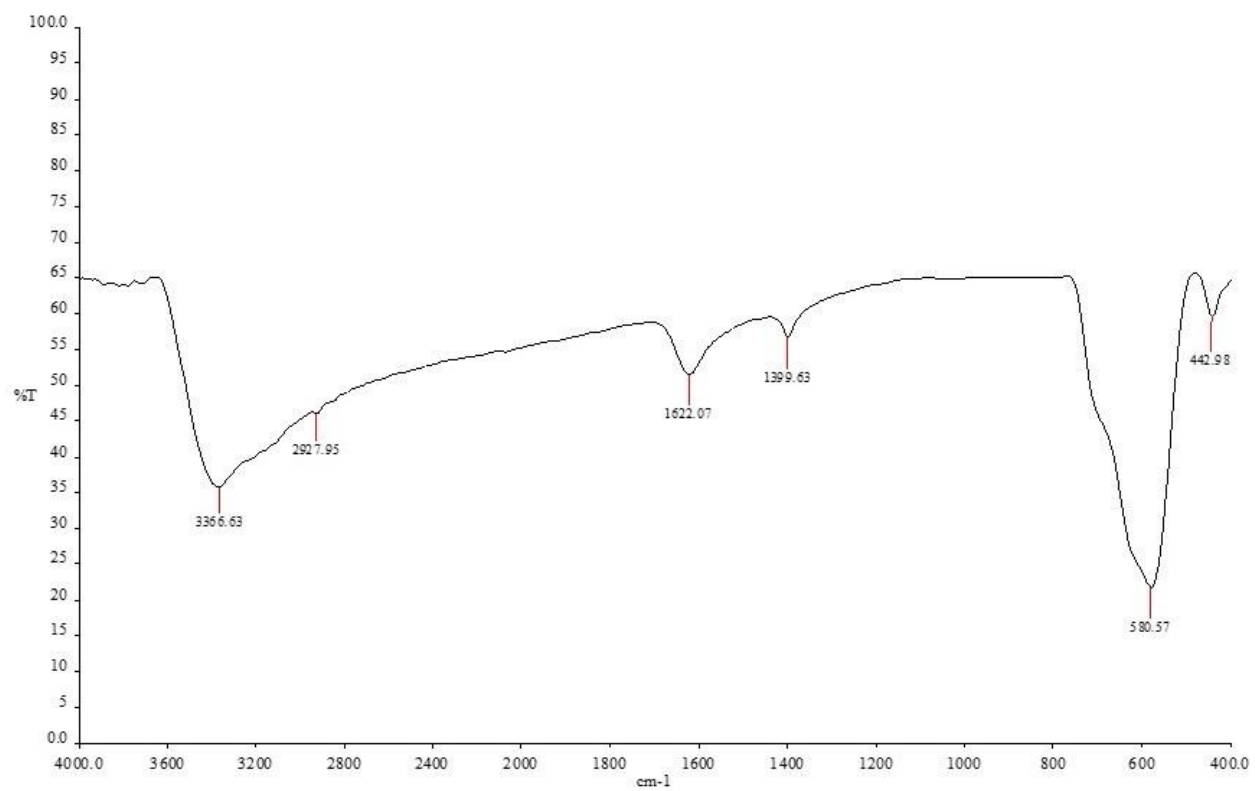

Figure S1. FT-IR spectrum of Fe<sub>3</sub>O<sub>4</sub> MNPs

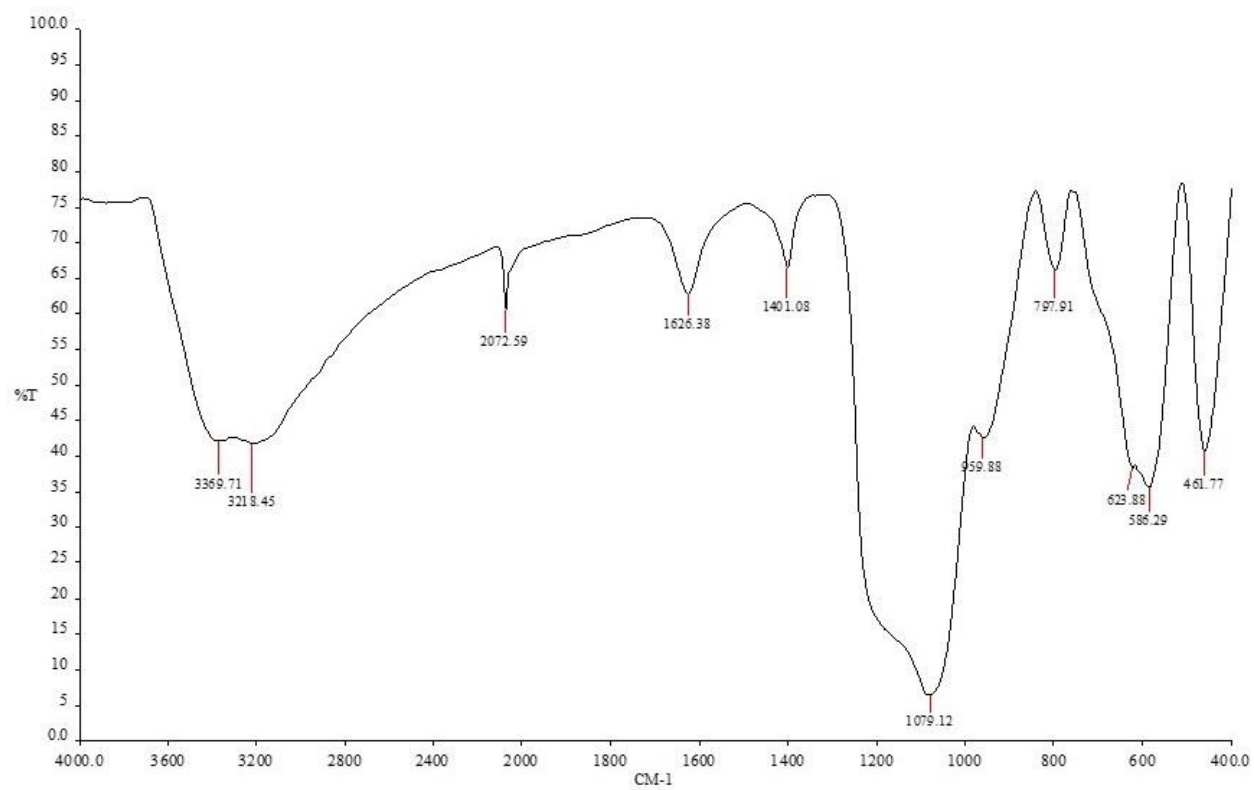

Figure S2. FT-IR spectrum of core-shell  $\text{Fe}_3\text{O}_4@\text{SiO}_2$  MNPs

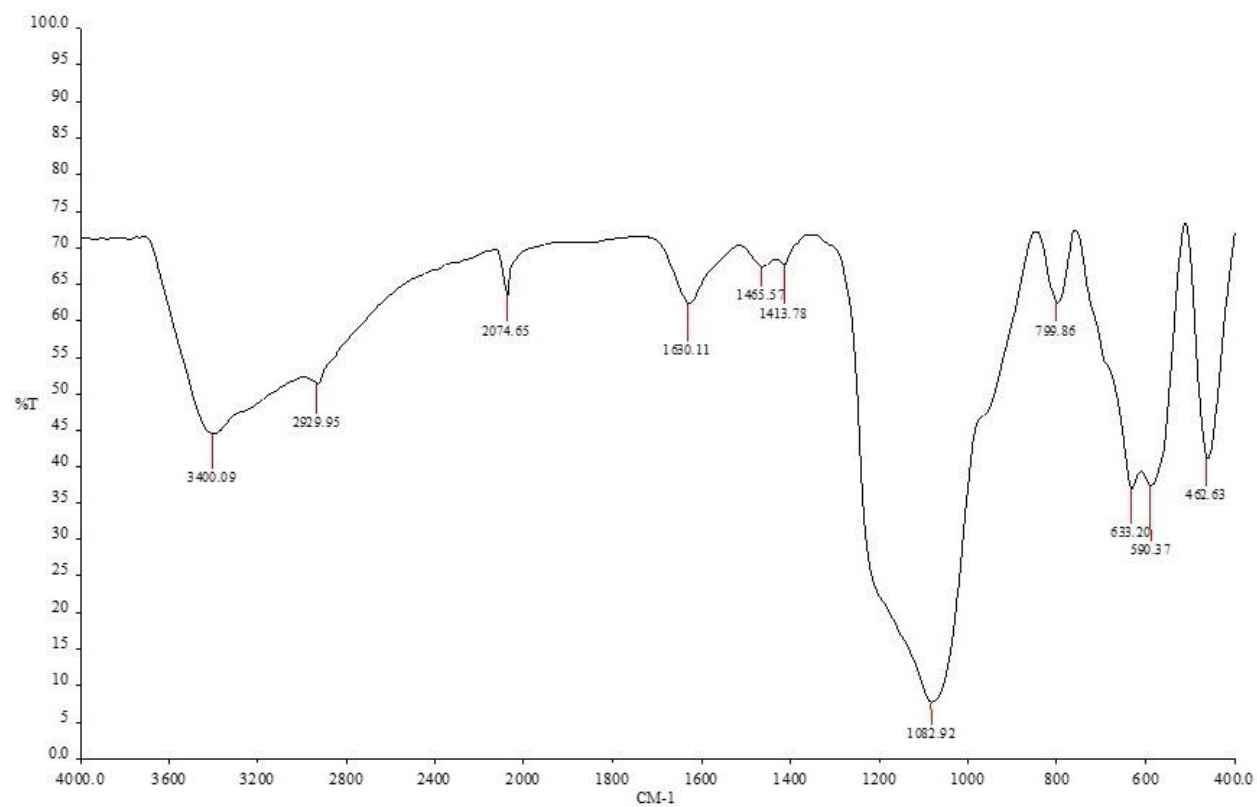

Figure S3. FT-IR spectrum of Mag@Me sorbent

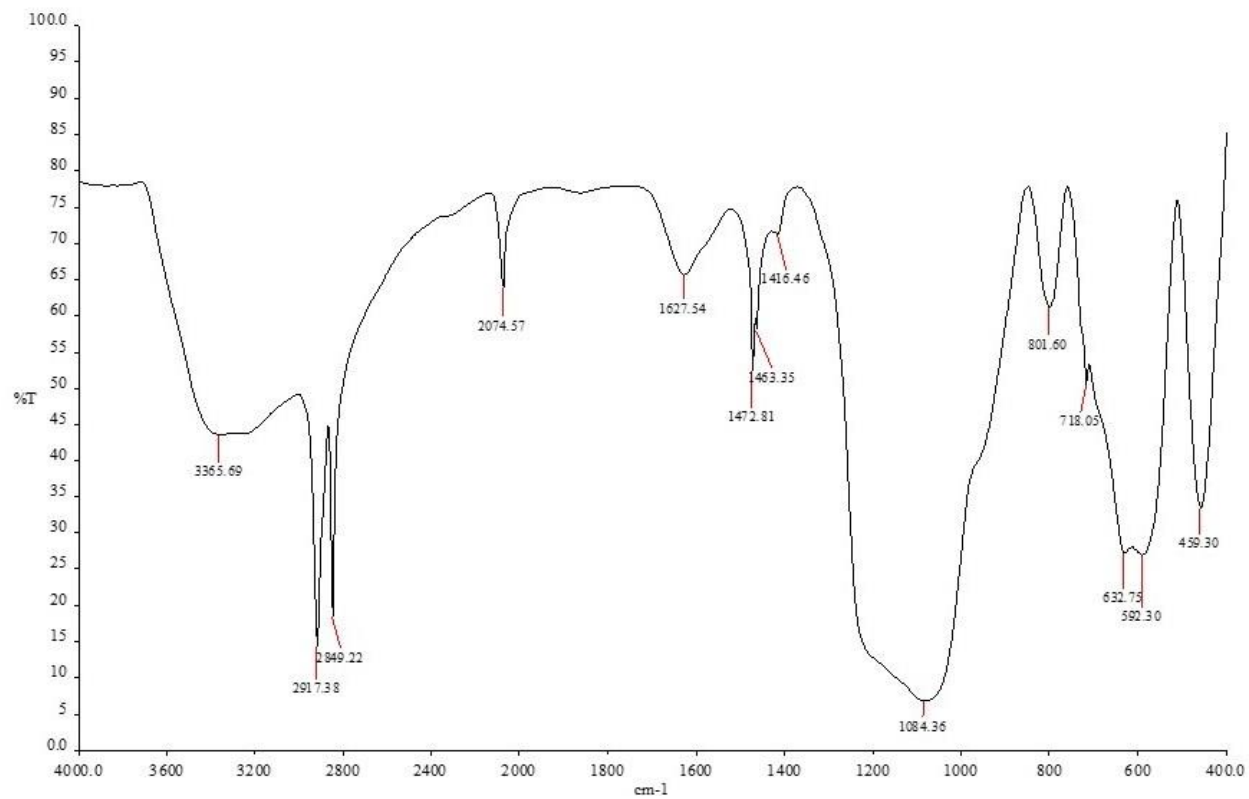

Figure S4. FT-IR spectrum of Mag@N1M1 sorbent

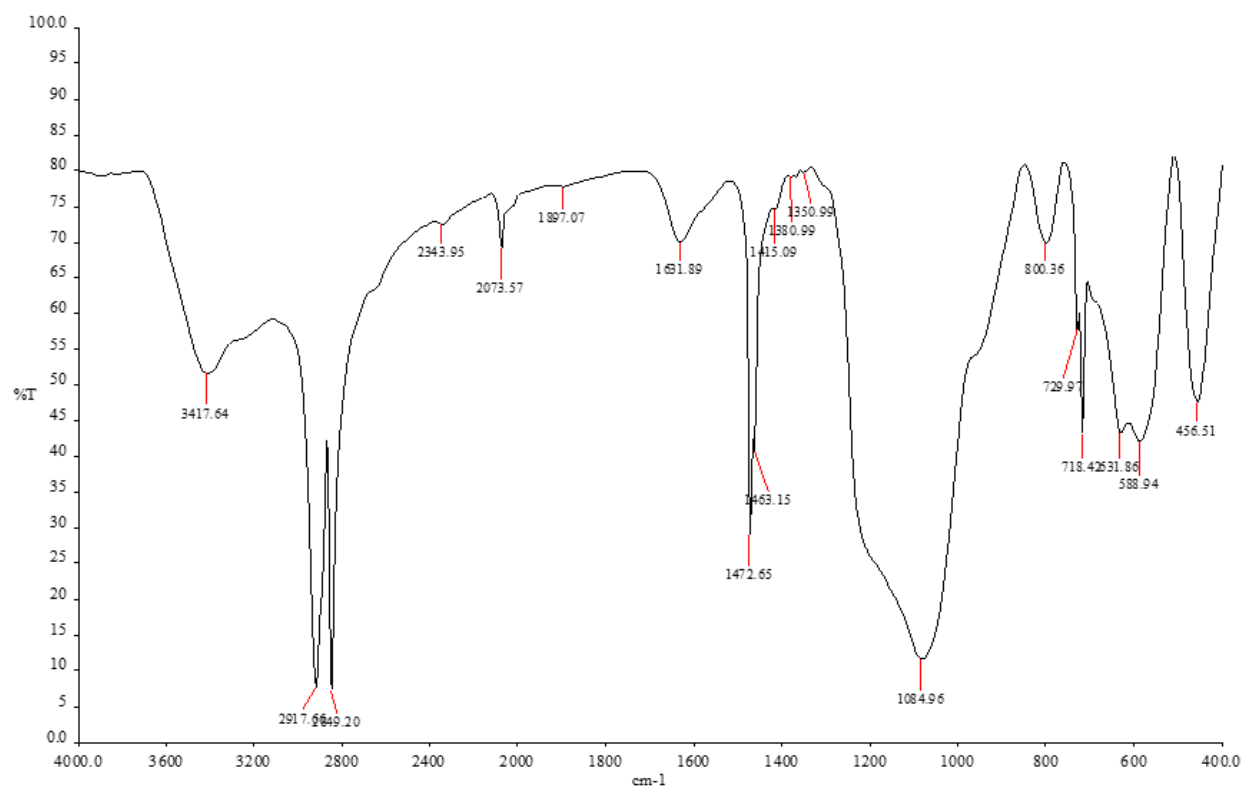

Figure S5. FT-IR spectrum of Mag@N1M3 sorbent

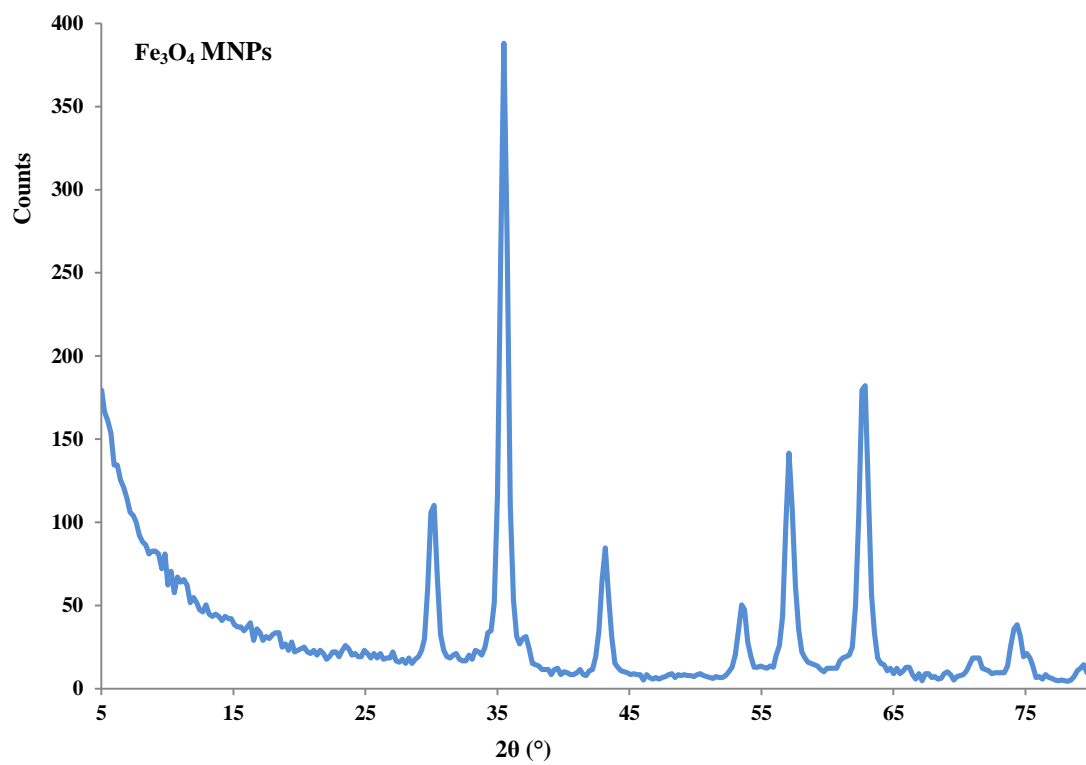

Figure S6. XRD pattern of Fe<sub>3</sub>O<sub>4</sub> MNPs

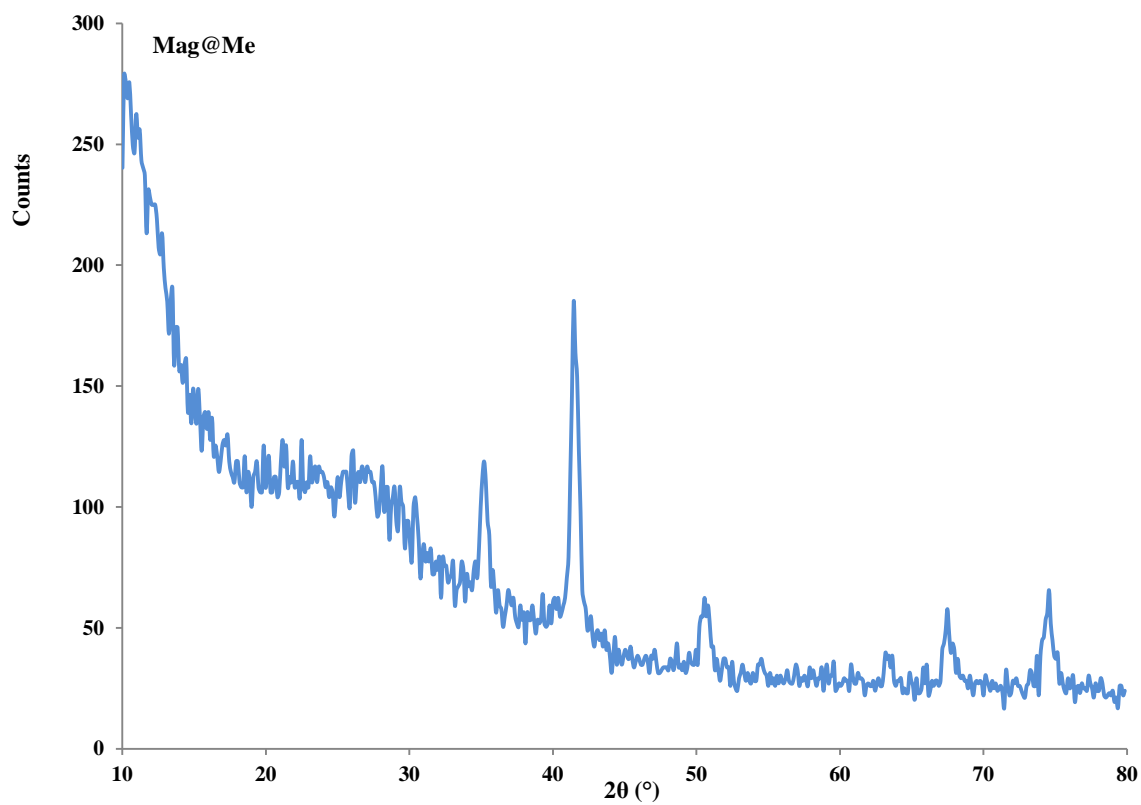

Figure S7. XRD pattern of Mag@Me sorbent

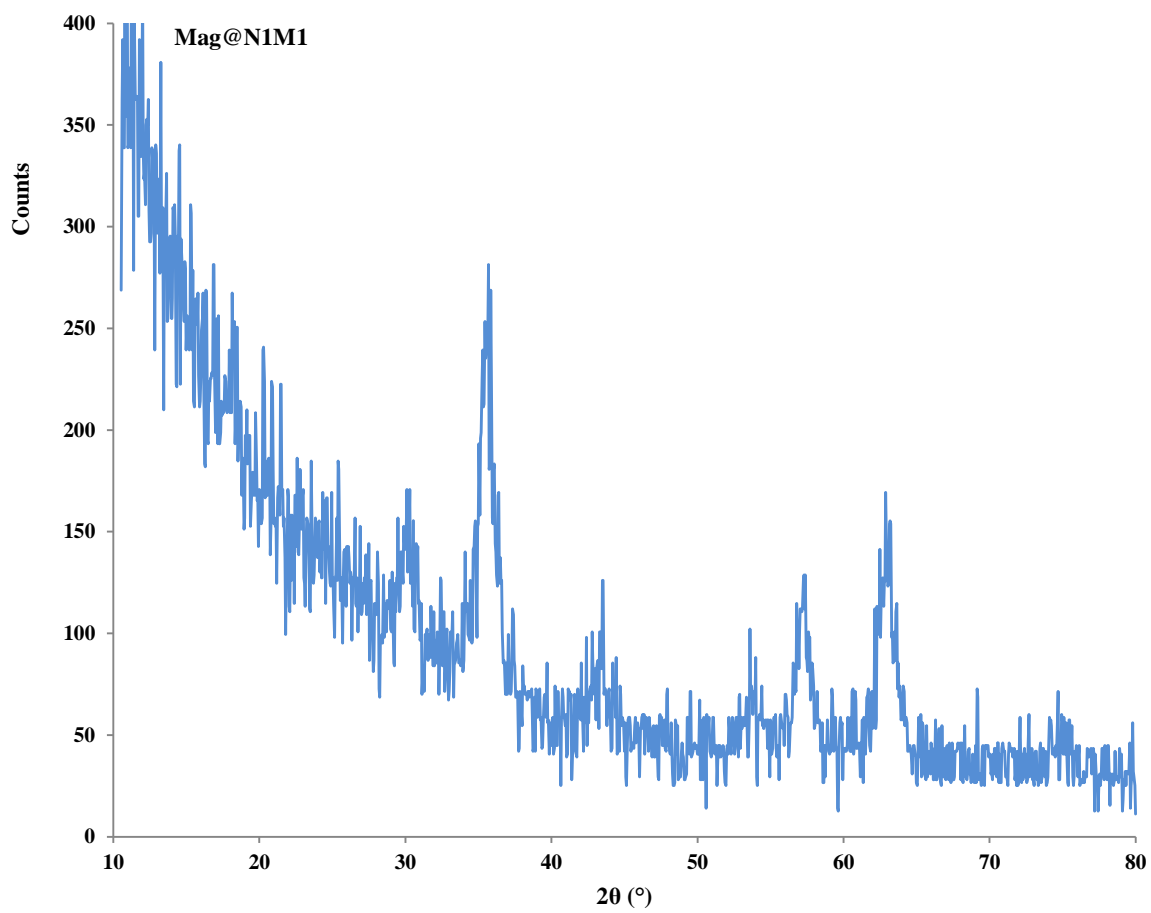

Figure S8. XRD pattern of Mag@N1M1 sorbent

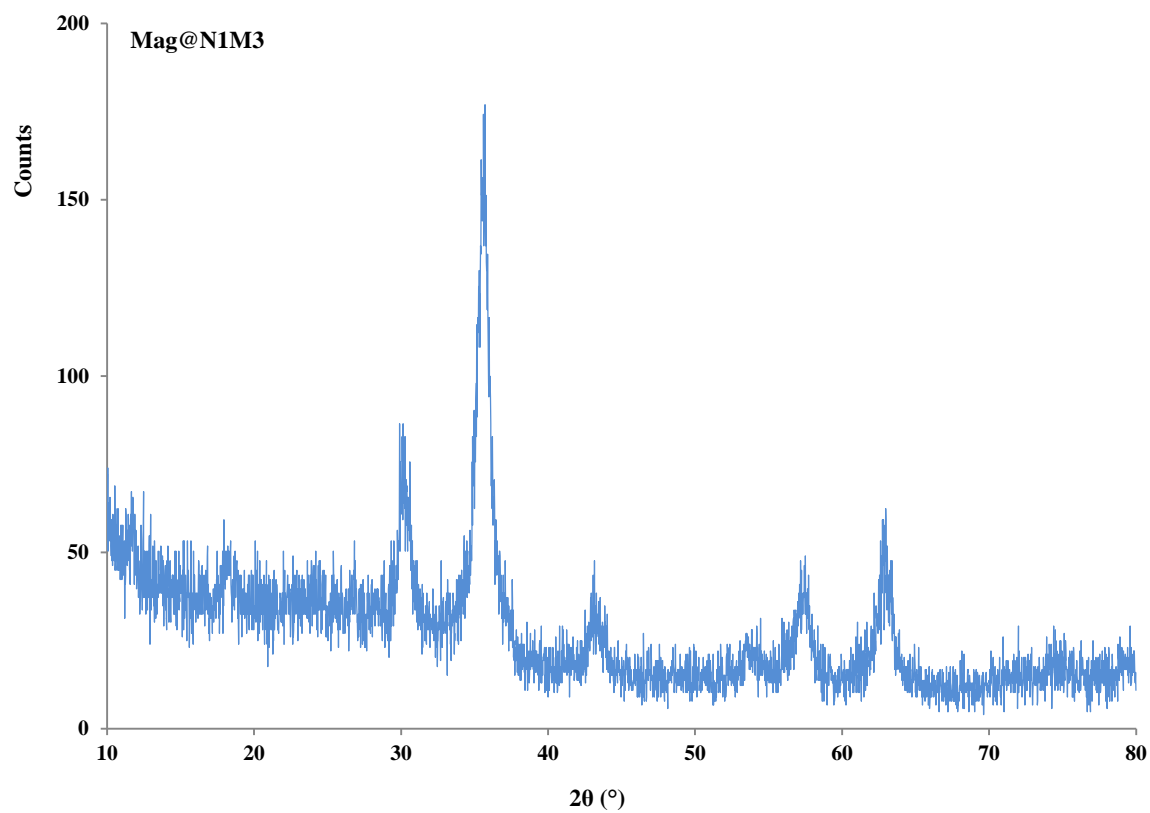

Figure S9. XRD pattern of Mag@N1M3 sorbent

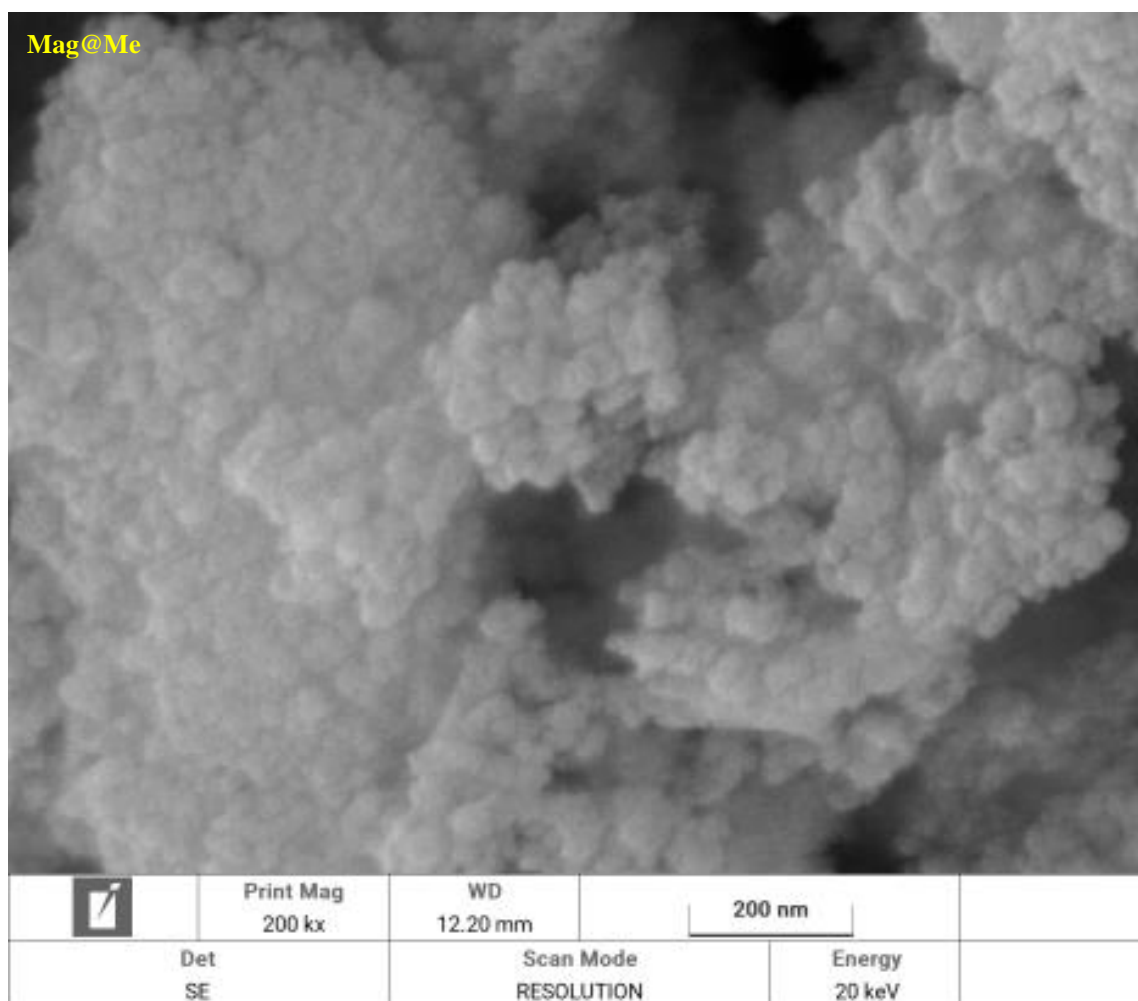

Figure S10. FESEM image of Mag@Me sorbent

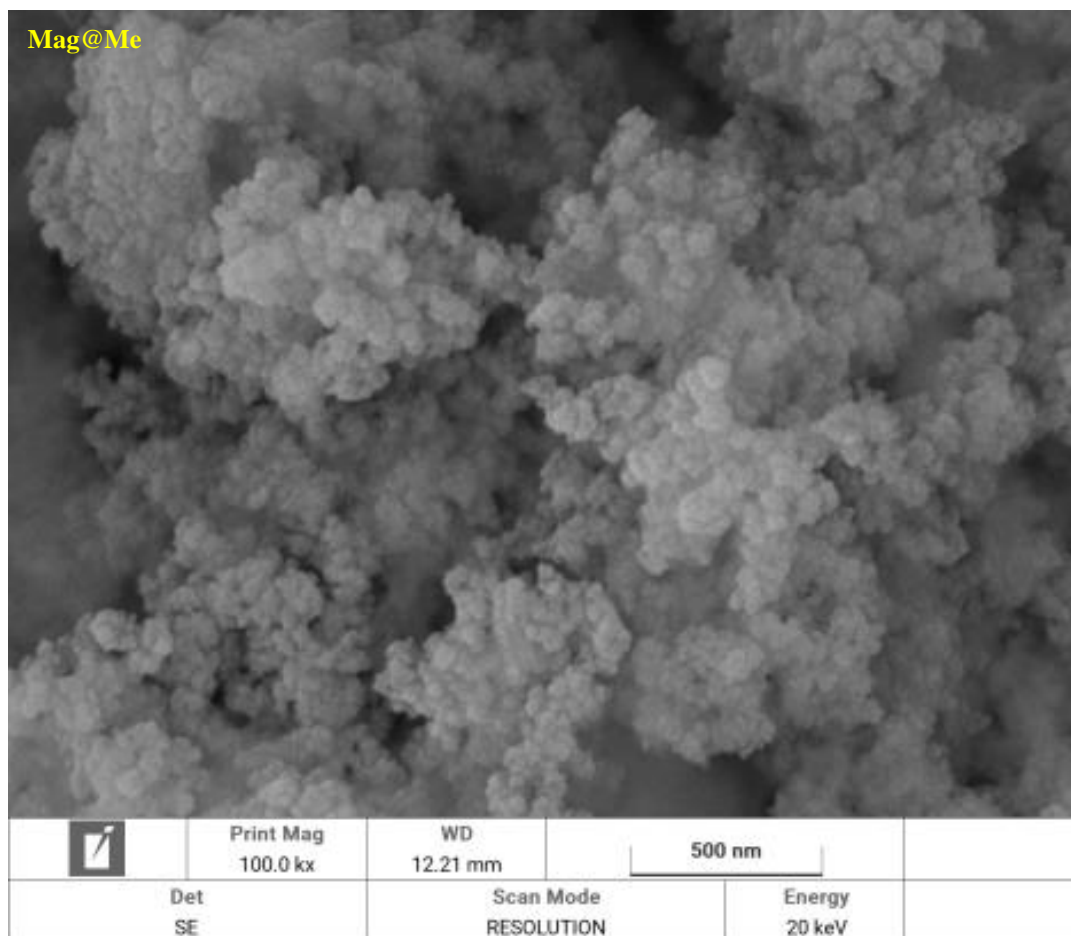

Figure S11. FESEM image of Mag@Me sorbent

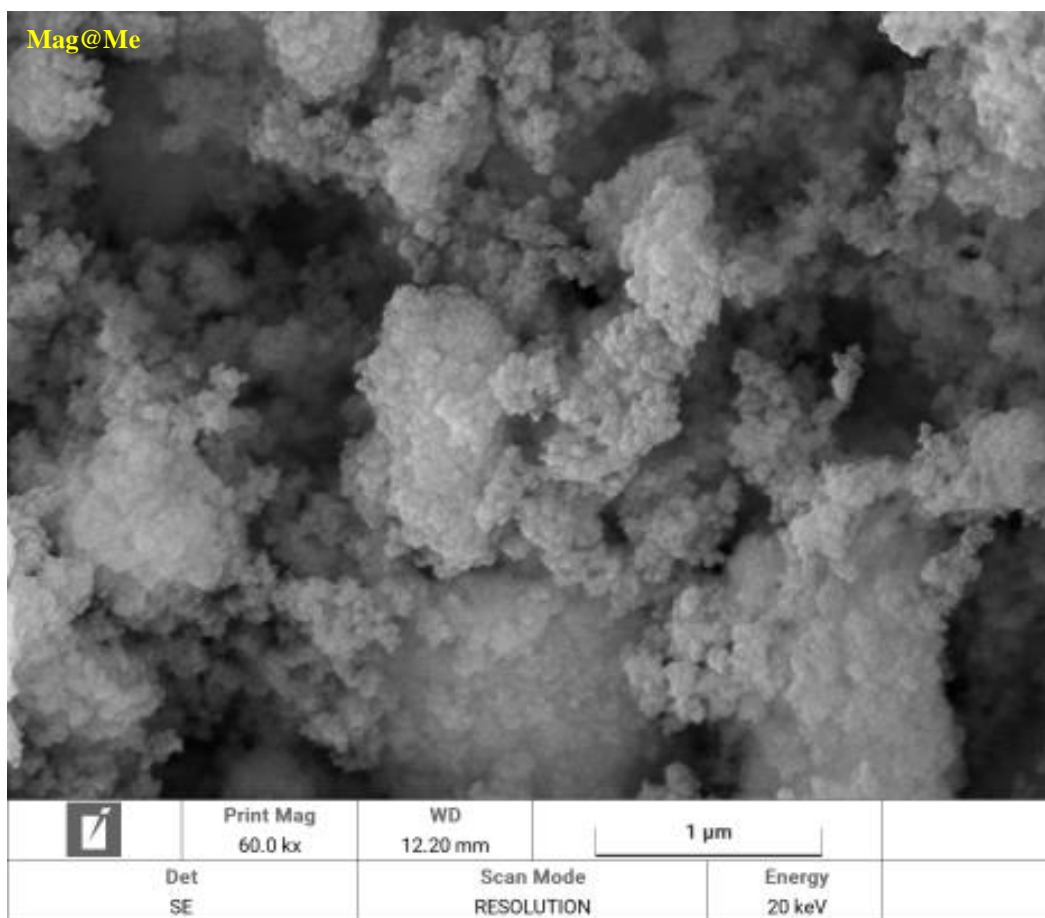

Figure S12. FESEM image of Mag@Me sorbent

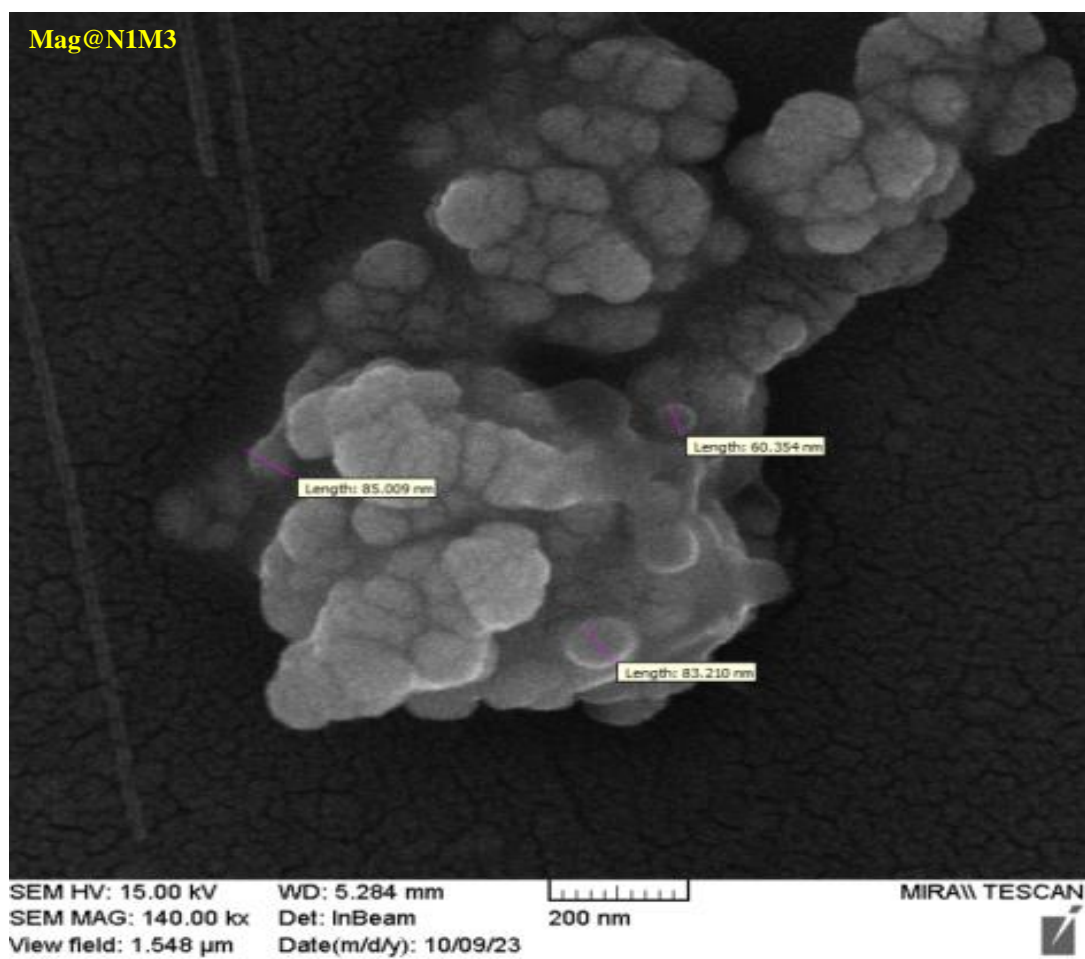

Figure S13. FESEM image of Mag@N1M3 sorbent

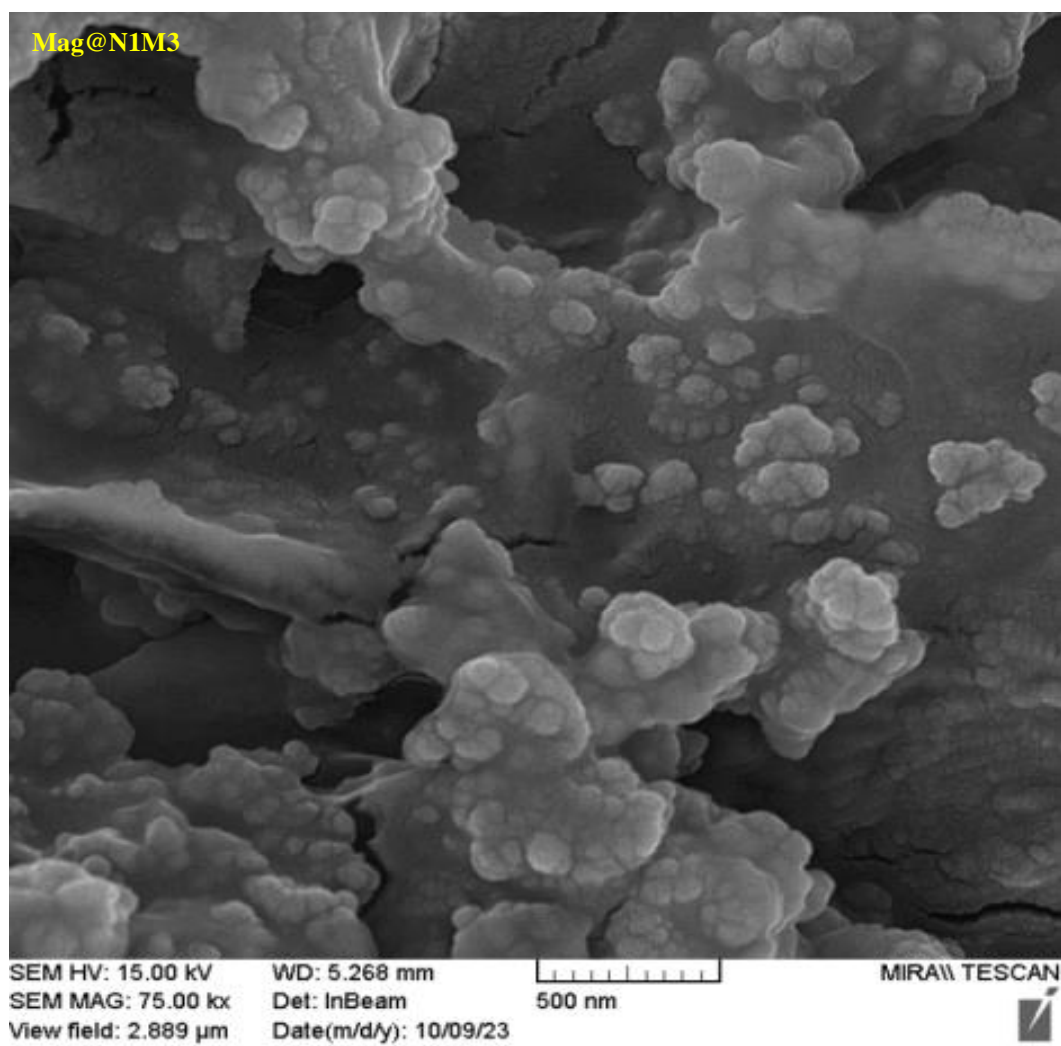

Figure S14. FESEM image of Mag@N1M3 sorbent

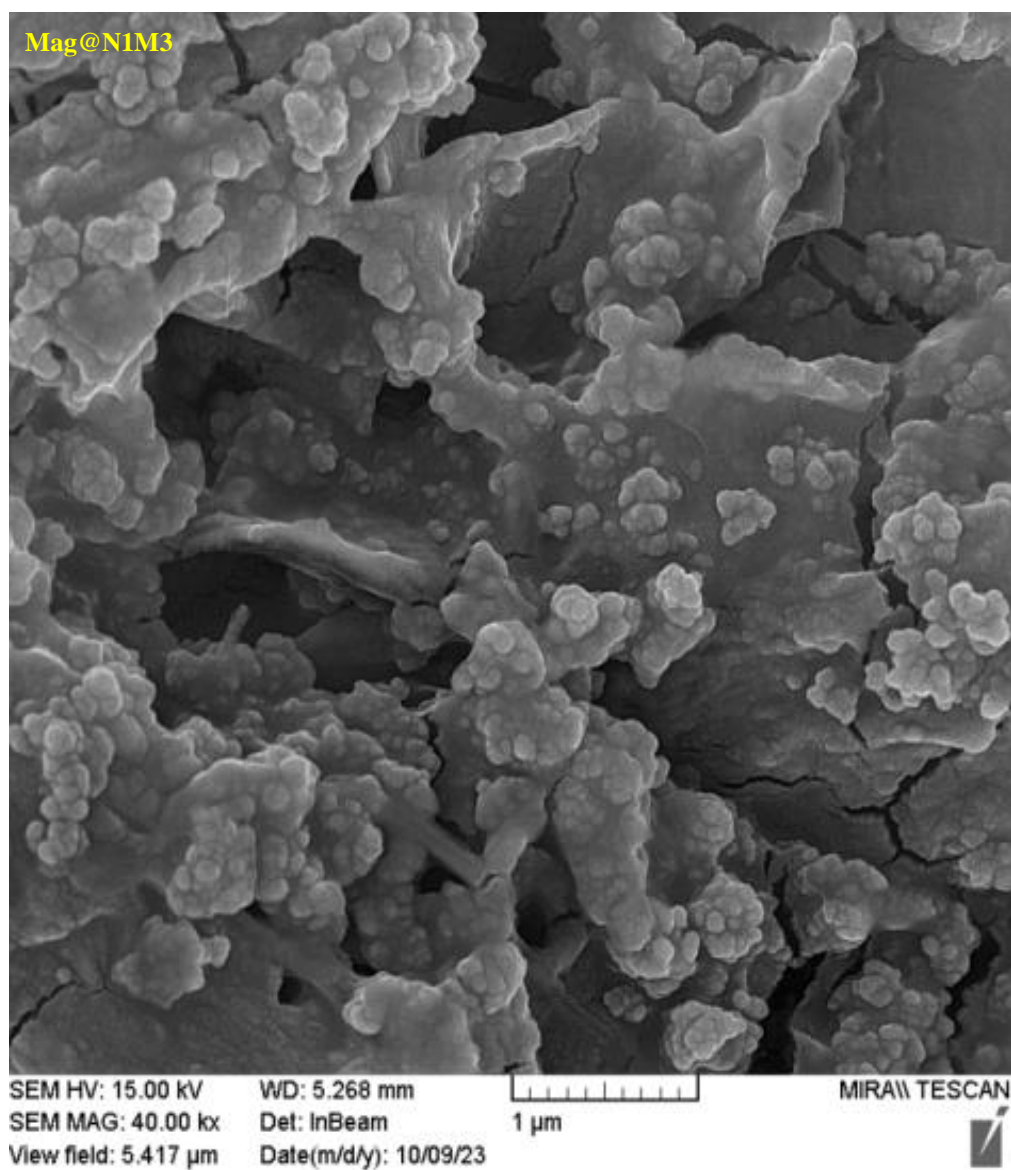

Figure S15. FESEM image of Mag@N1M3 sorbent

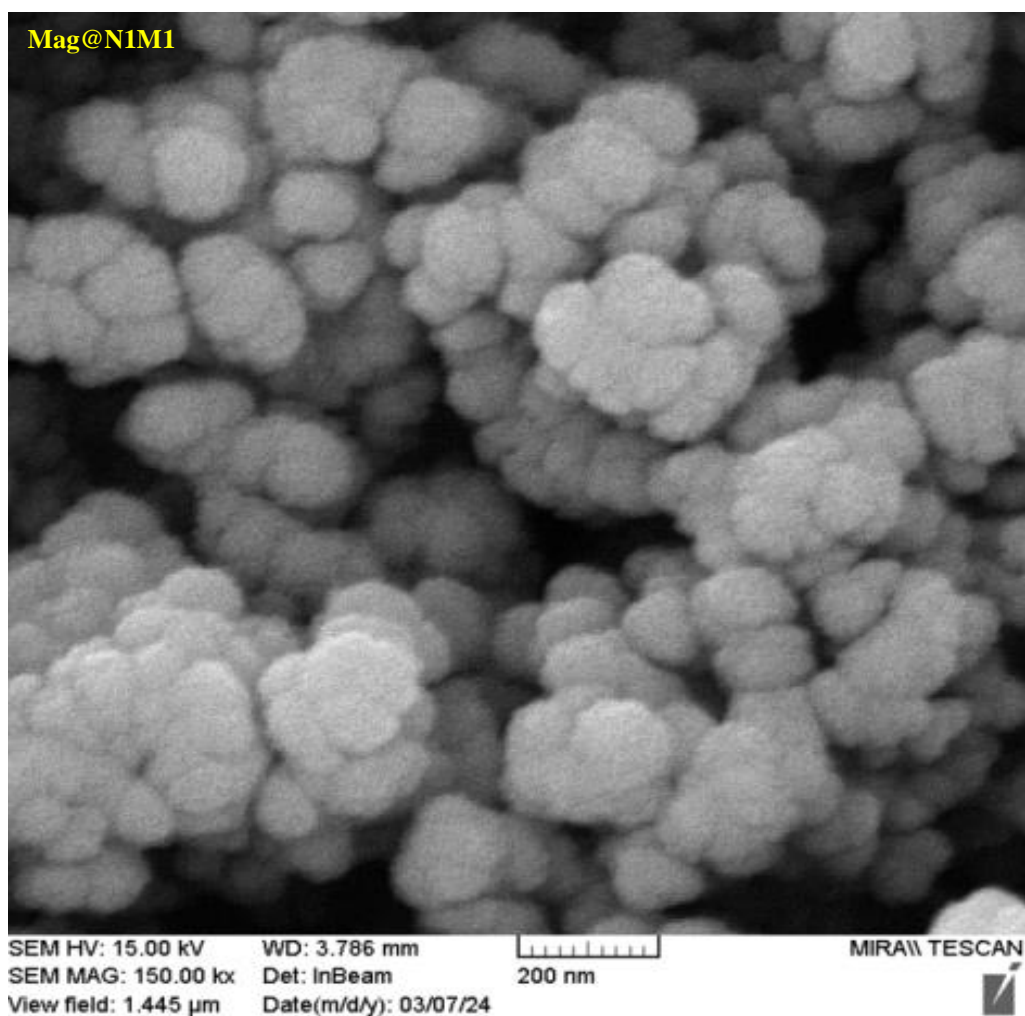

Figure S16. FESEM image of Mag@N1M1 sorbent

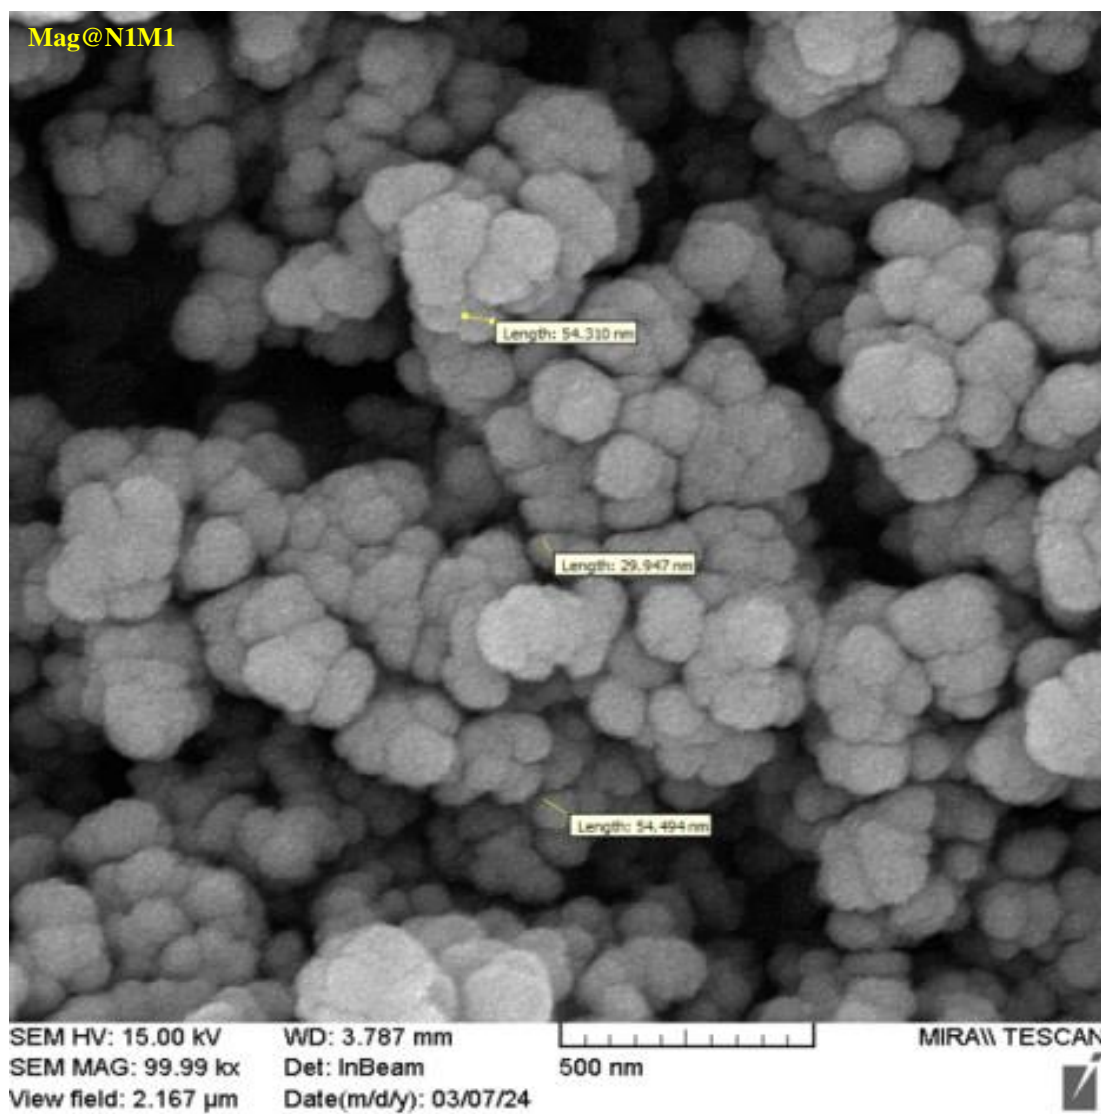

Figure S17. FESEM image of Mag@N1M1 sorbent

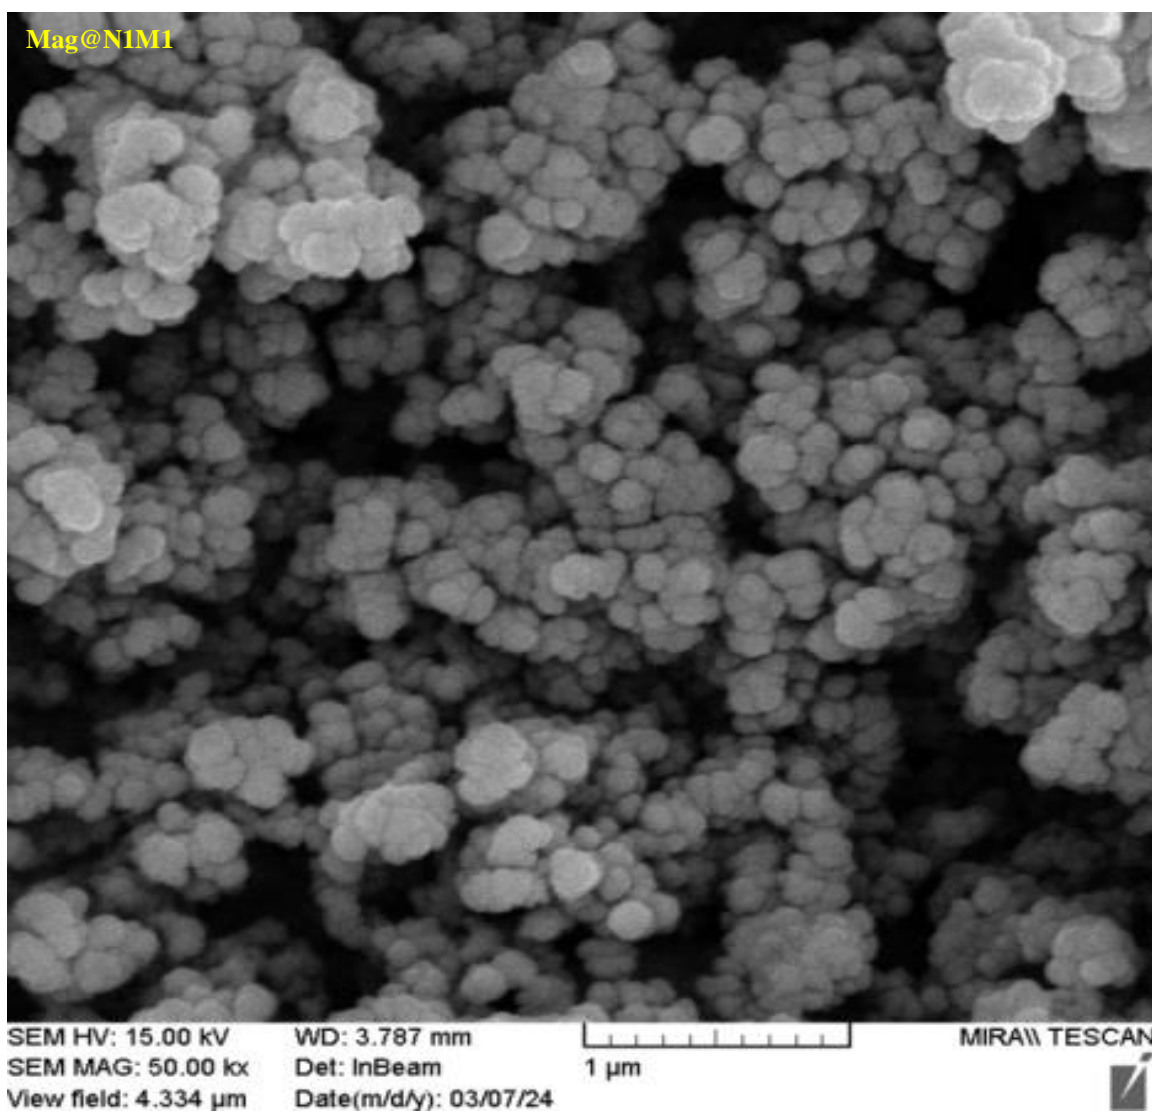

Figure S18. FESEM image of Mag@N1M1 sorbent

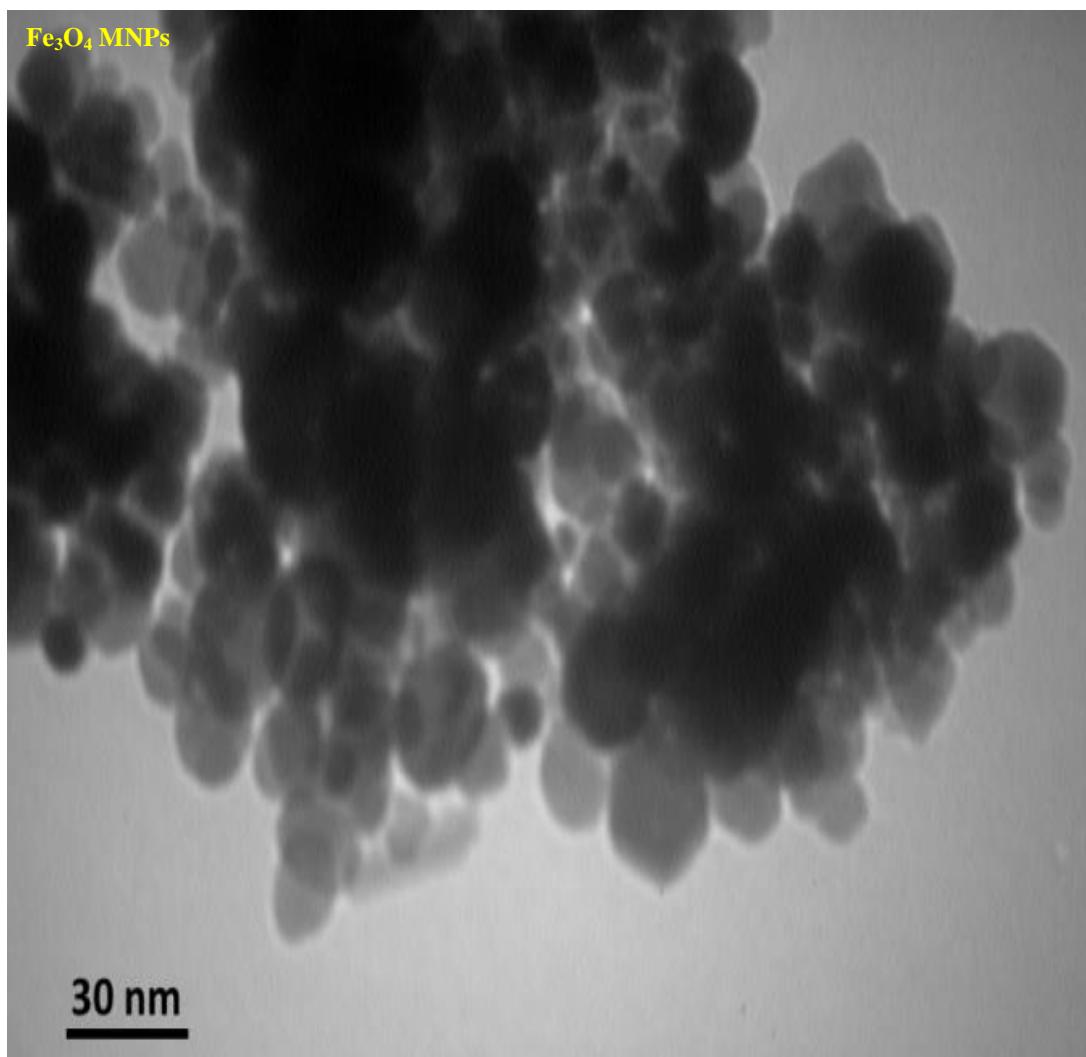

Figure S19. TEM image of Fe<sub>3</sub>O<sub>4</sub> MNPs

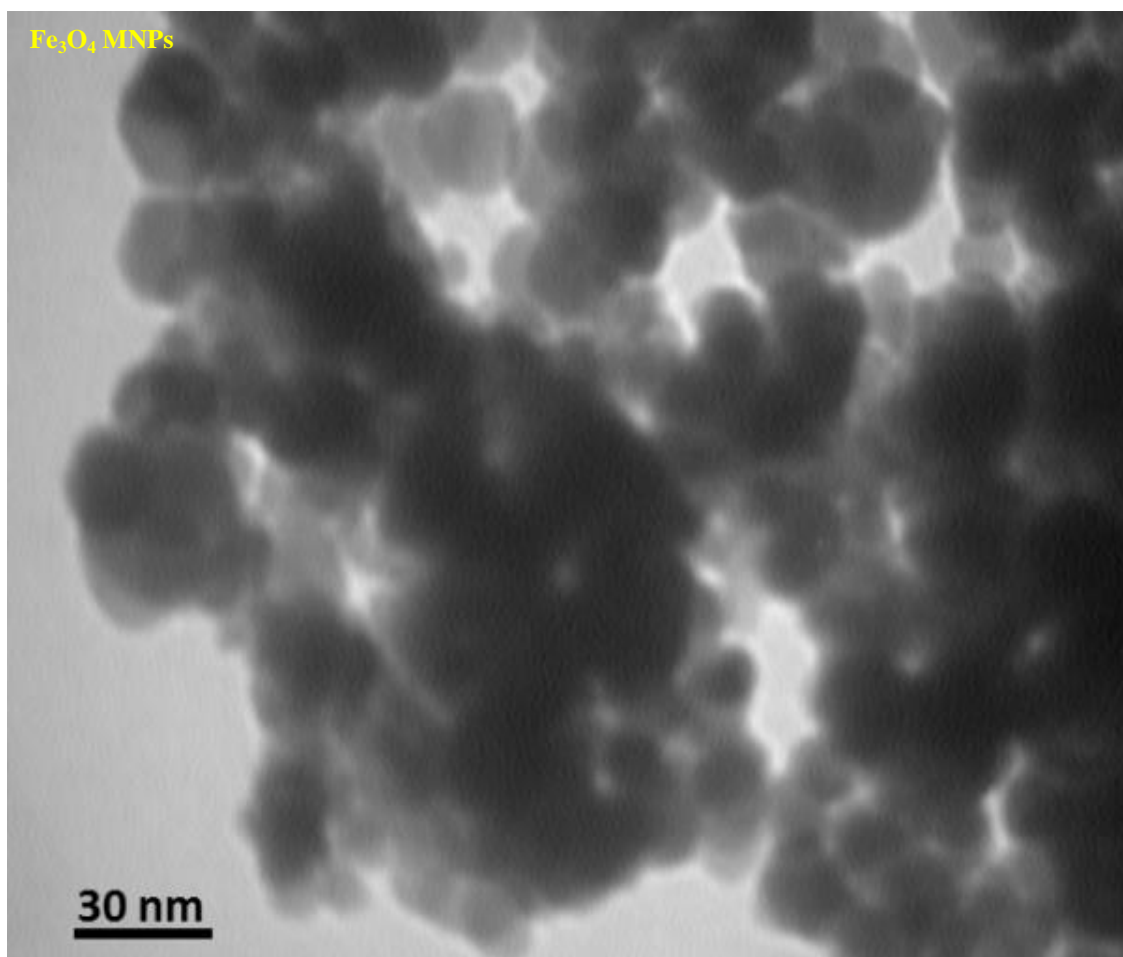

Figure S20. TEM image of Fe<sub>3</sub>O<sub>4</sub> MNPs

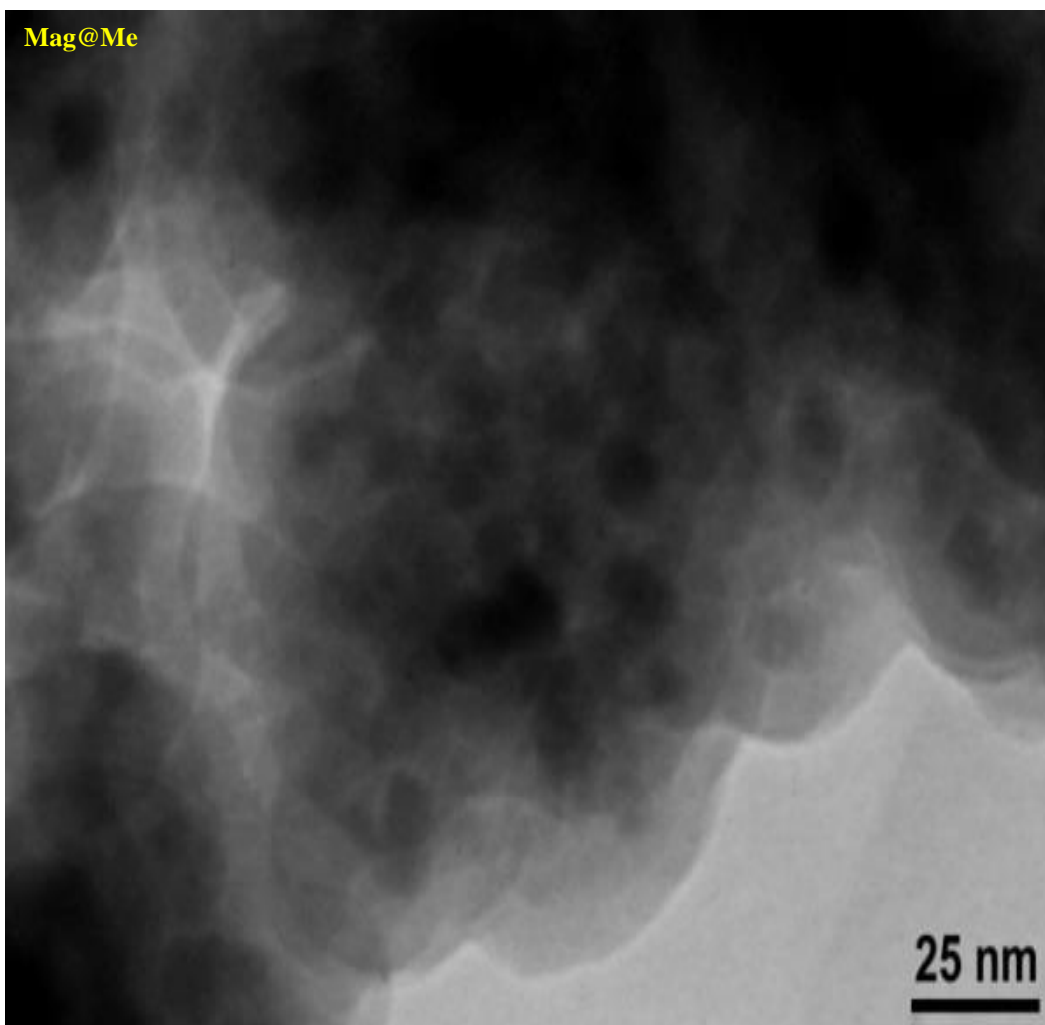

Figure S21. TEM image of Mag@Me sorbent

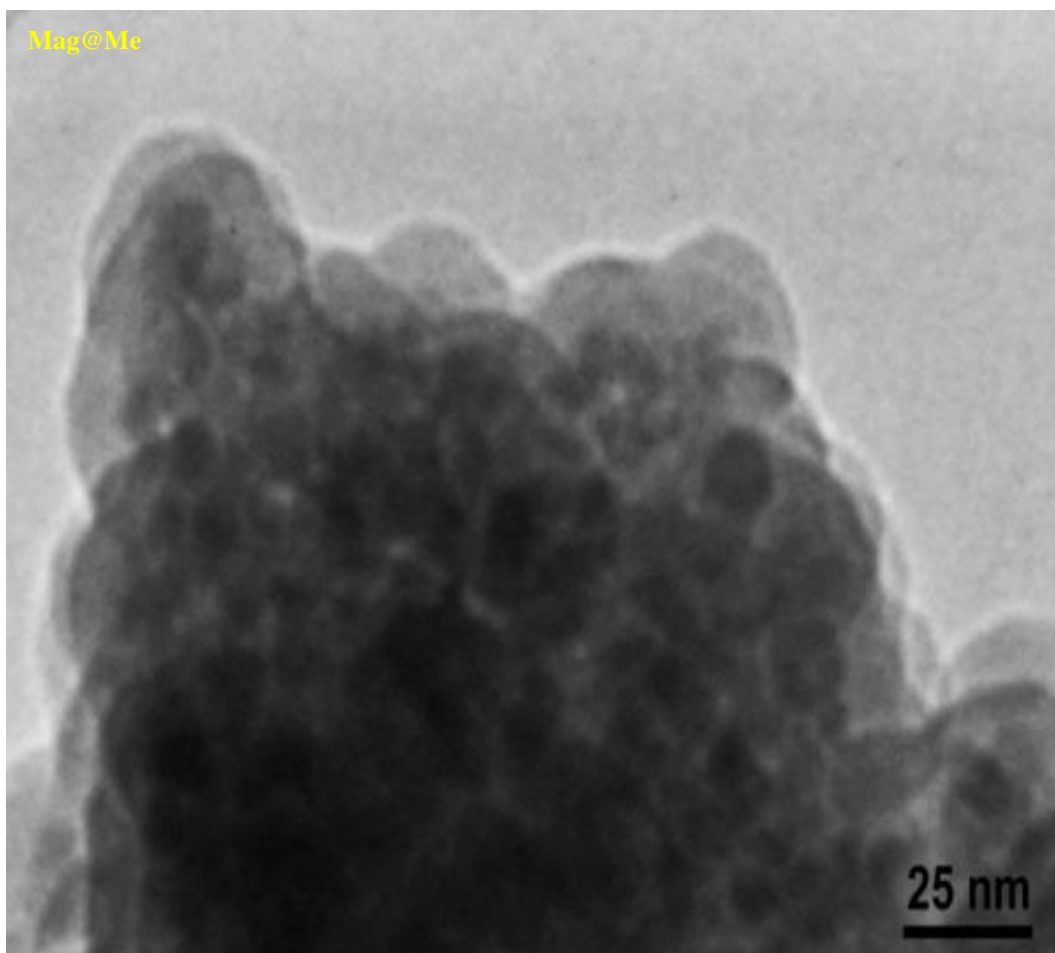

Figure S22. TEM image of Mag@Me sorbent

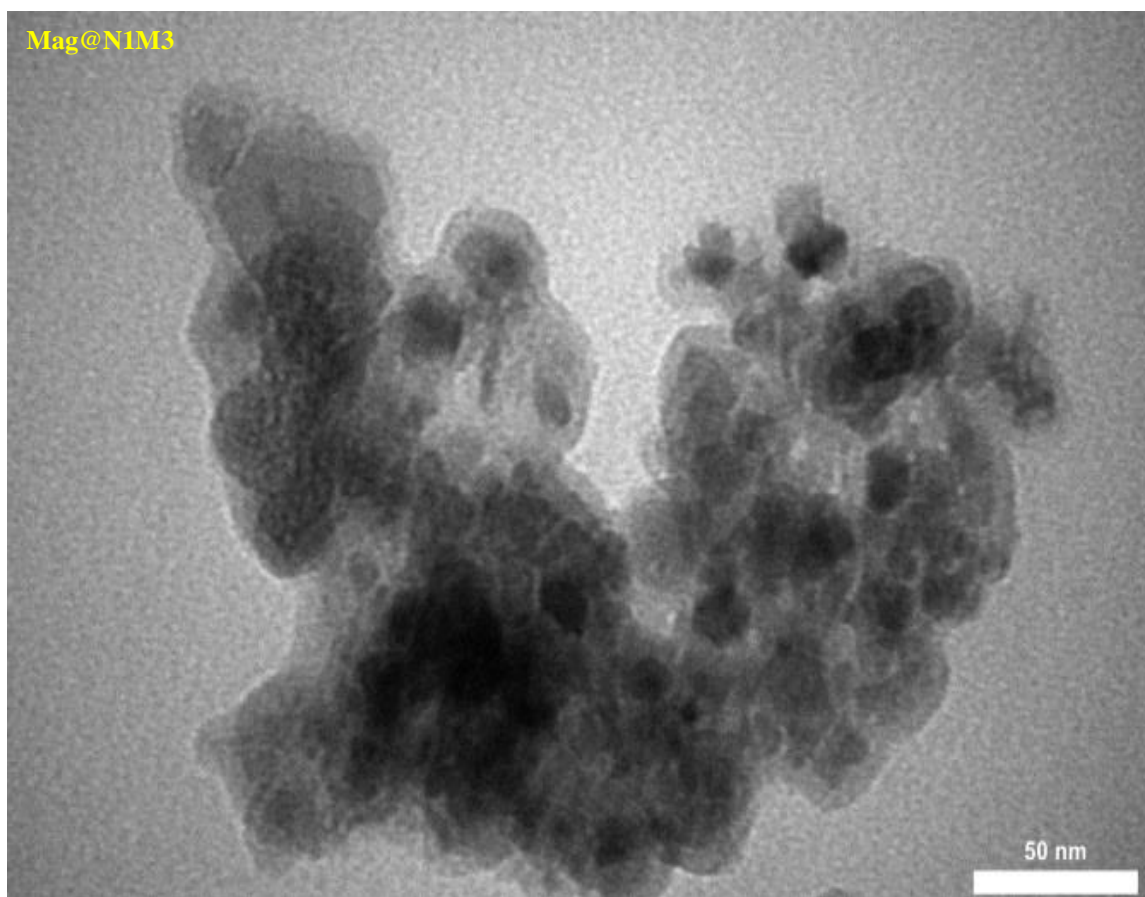

Figure S23. TEM image of Mag@N1M3 sorbent

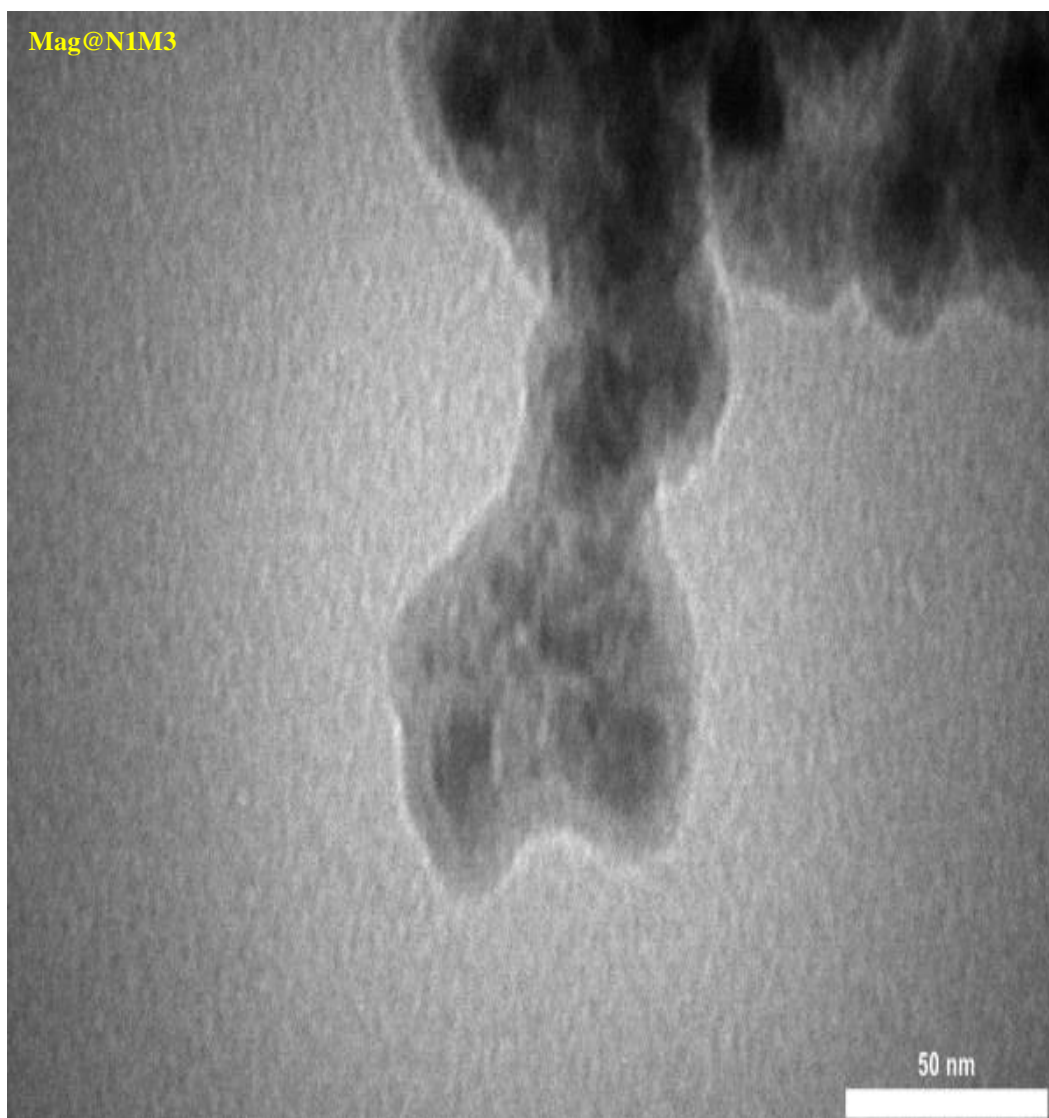

Figure S24. TEM image of Mag@N1M3 sorbent

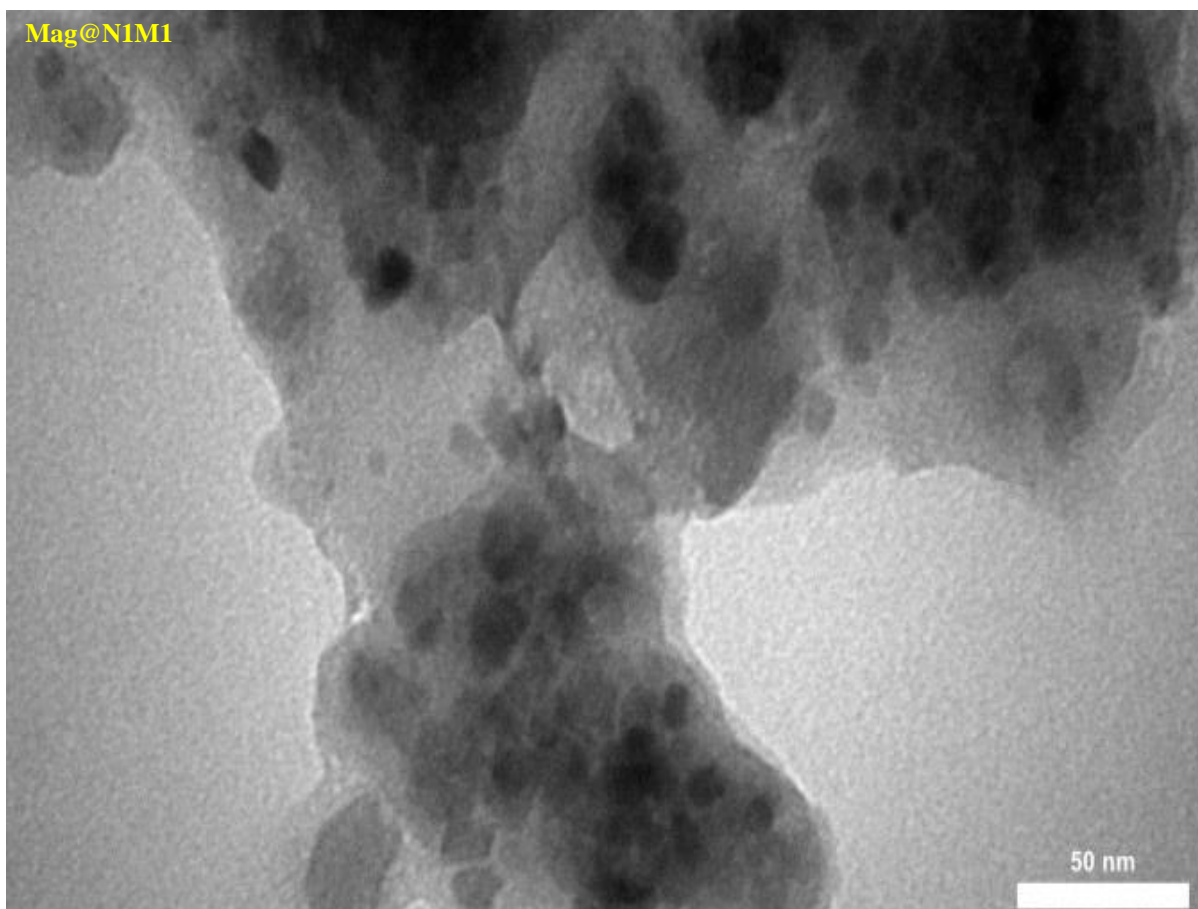

Figure S25. TEM image of Mag@N1M1 sorbent

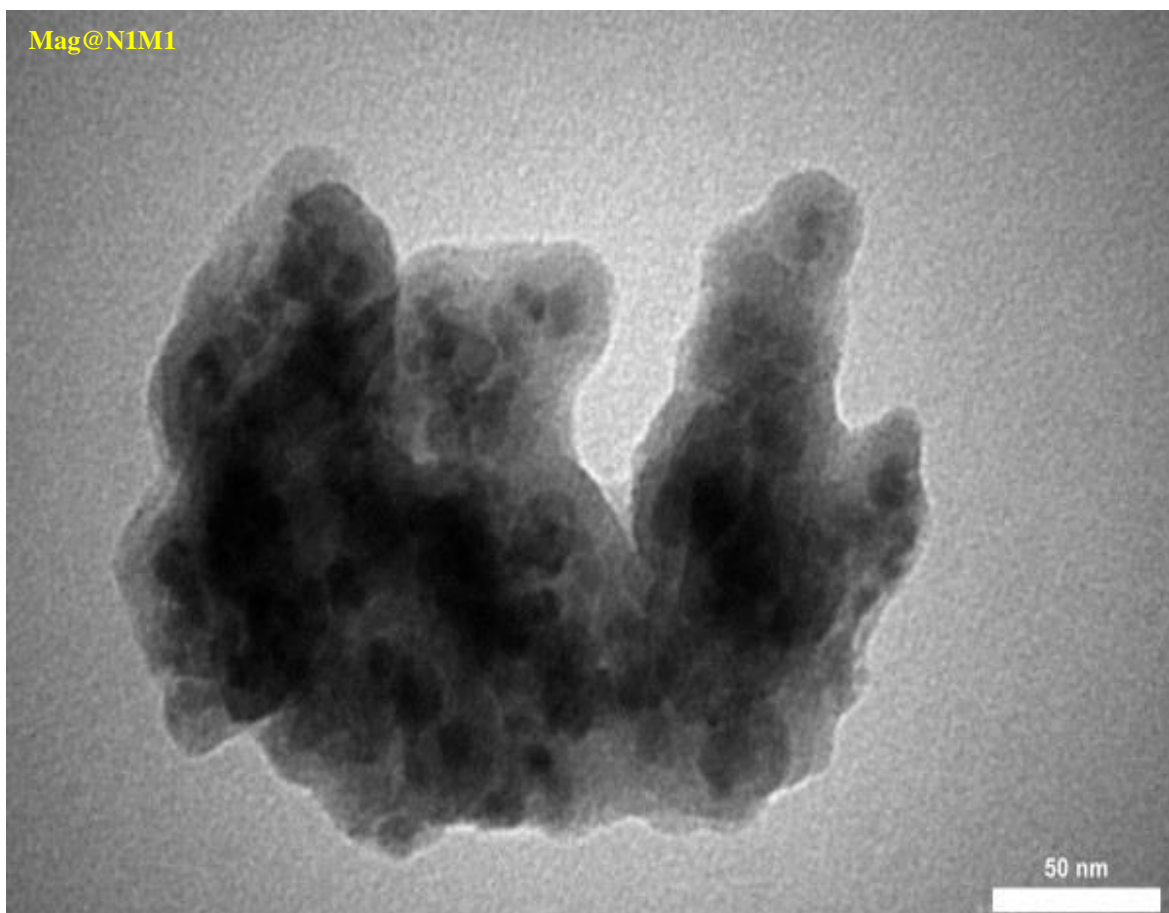

Figure S26. TEM image of Mag@N1M1 sorbent

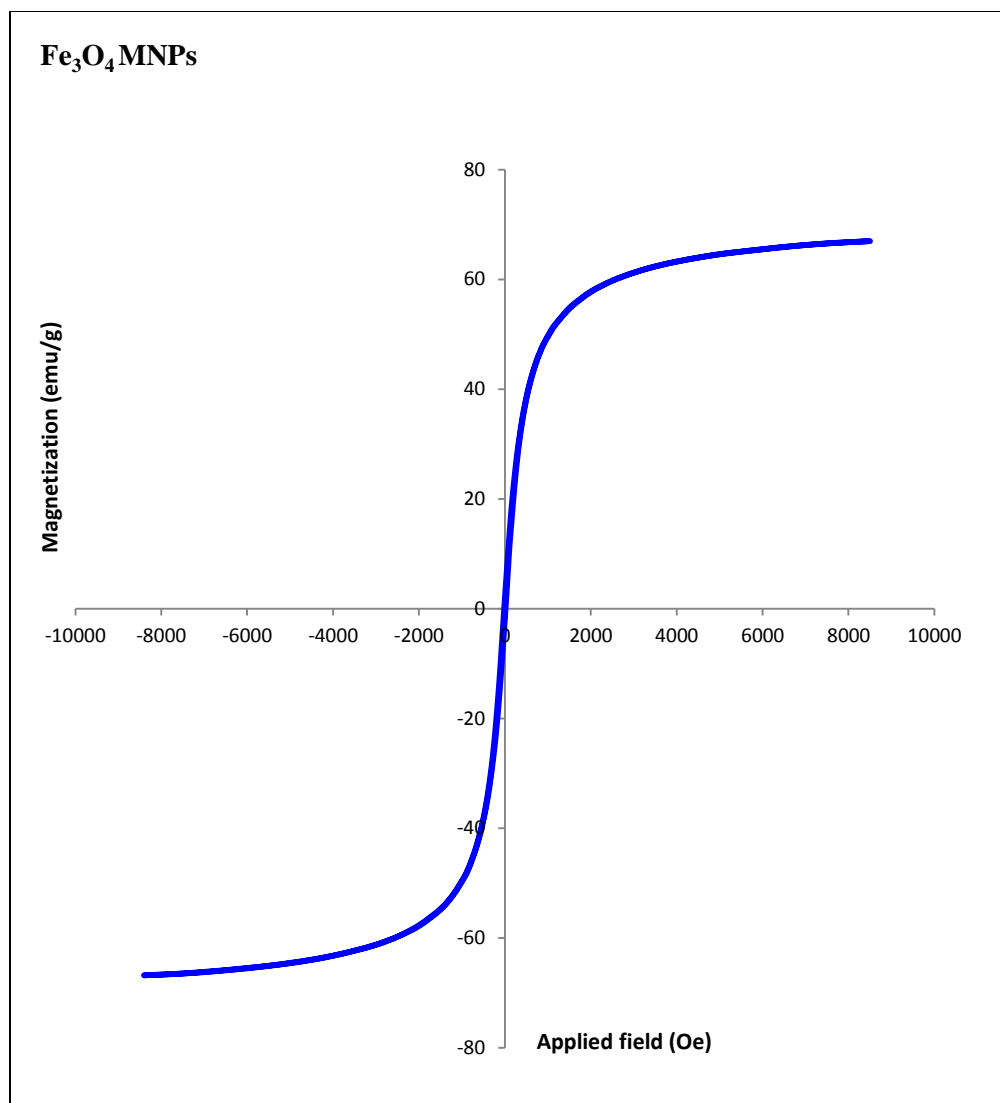

Figure S27. VSM curve of Fe<sub>3</sub>O<sub>4</sub> MNPs

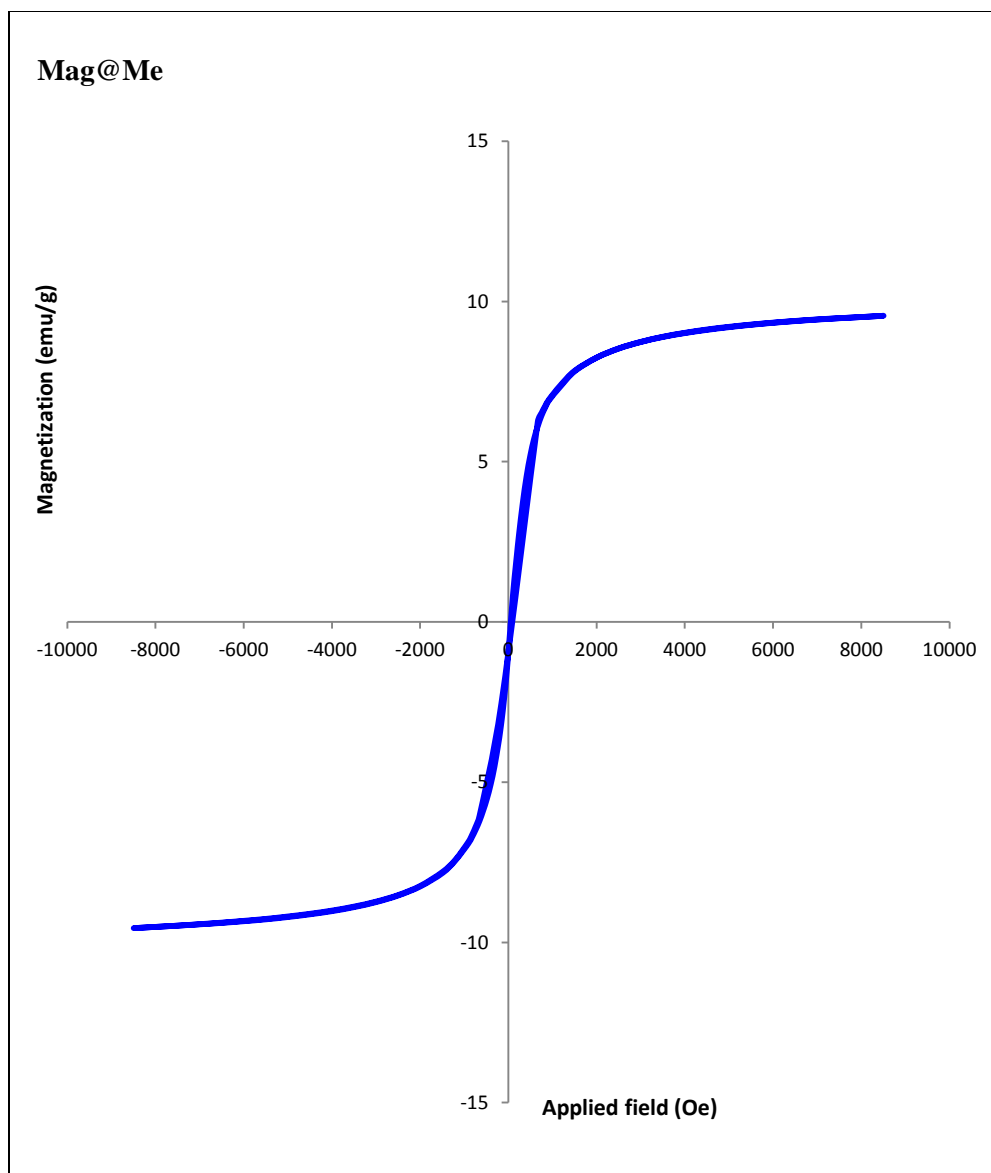

Figure S28. VSM curve of Mag@Me sorbent

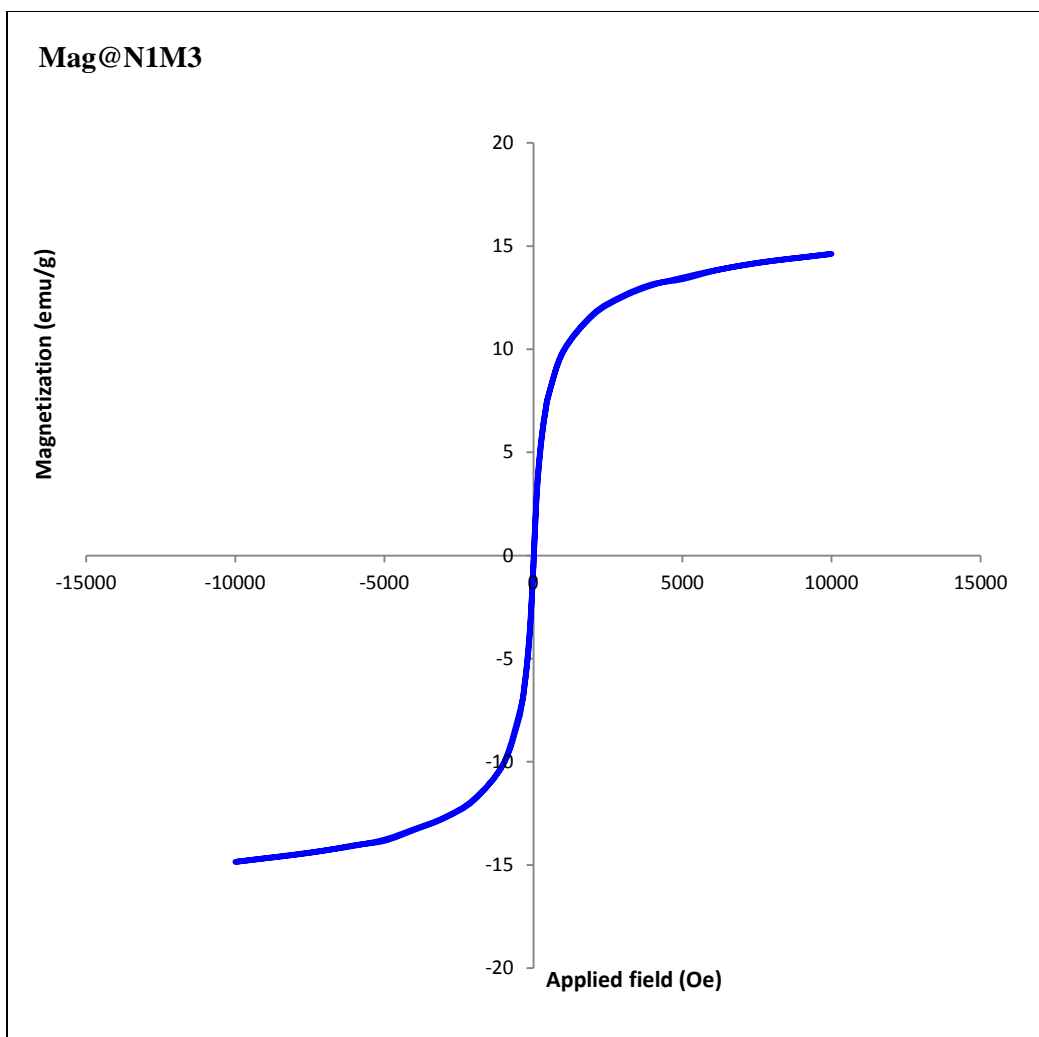

Figure S29. VSM curve of Mag@N1M3 sorbent

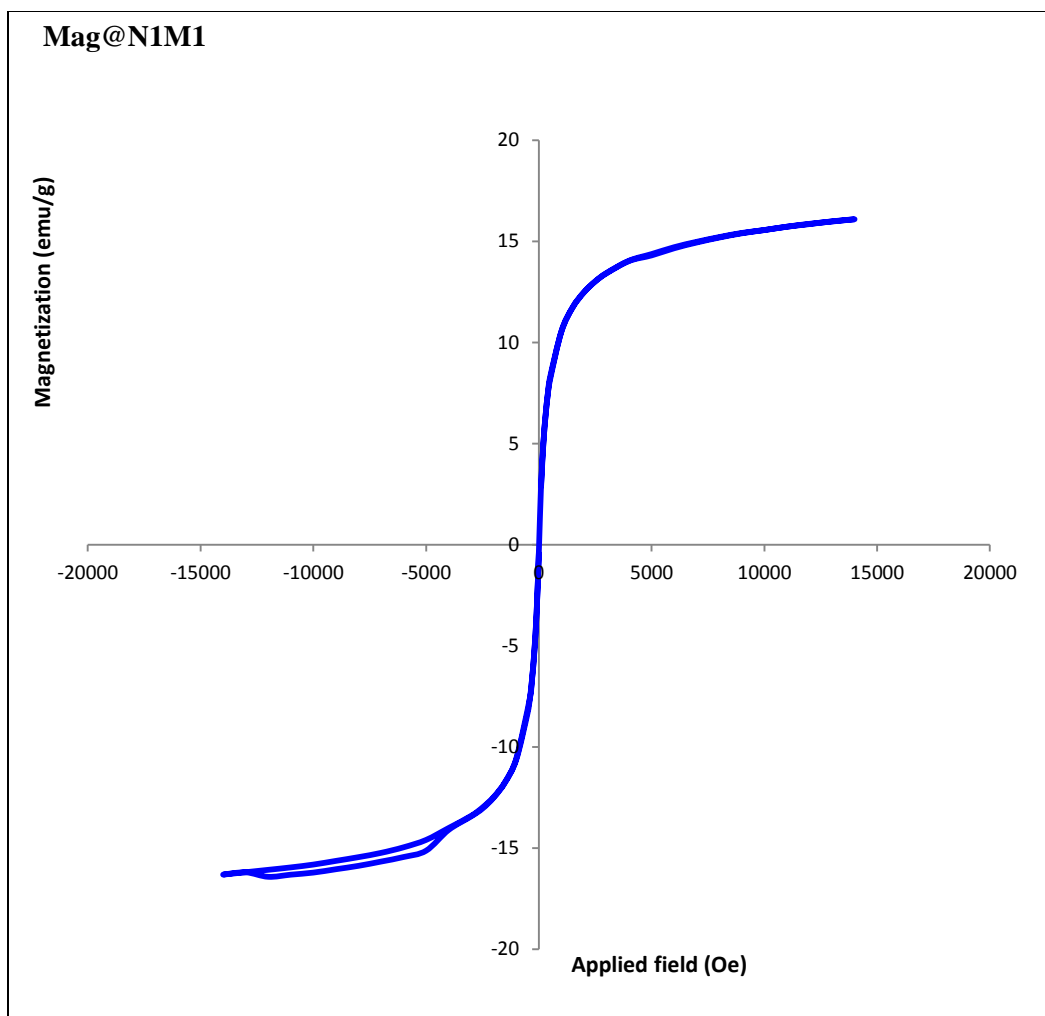

Figure S30. VSM curve of Mag@N1M1 sorbent

Sample: Me  
Size: 1.9140 mg  
Method: Dual Ramp  
Comment: 25-900@20-Air

File: C:\...\Me\Me.001  
Operator: Taban Lab  
Run Date: 06-Apr-2023 10:06  
Instrument: SDT Q600 V20.9 Build 20

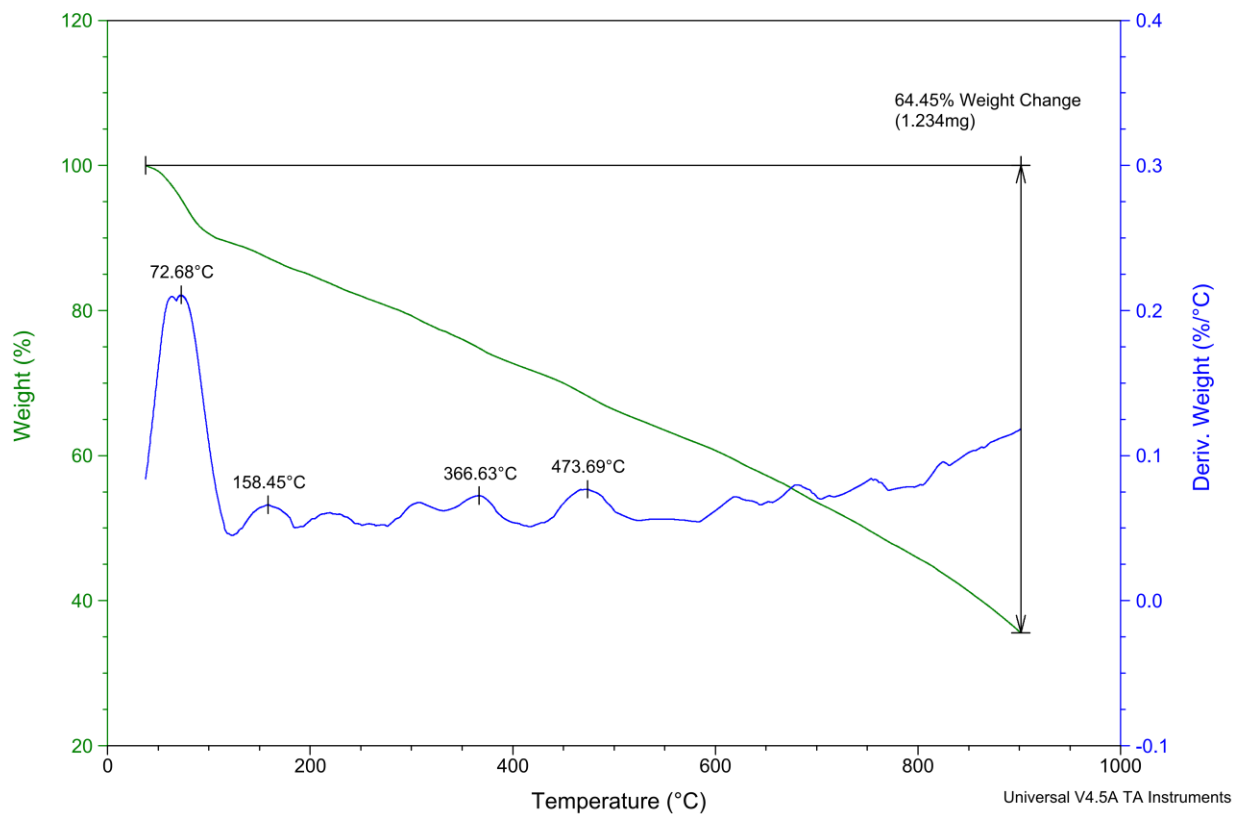

Figure S31. TGA termogram of Mag@Me sorbent

Sample: N1M3  
Size: 3.7000 mg  
Method: Dual Ramp  
Comment: 25-900@20-Ar

File: C:\...\N1M3\N1M3.001  
Operator: Taban Lab  
Run Date: 06-Apr-2023 08:04  
Instrument: SDT Q600 V20.9 Build 20

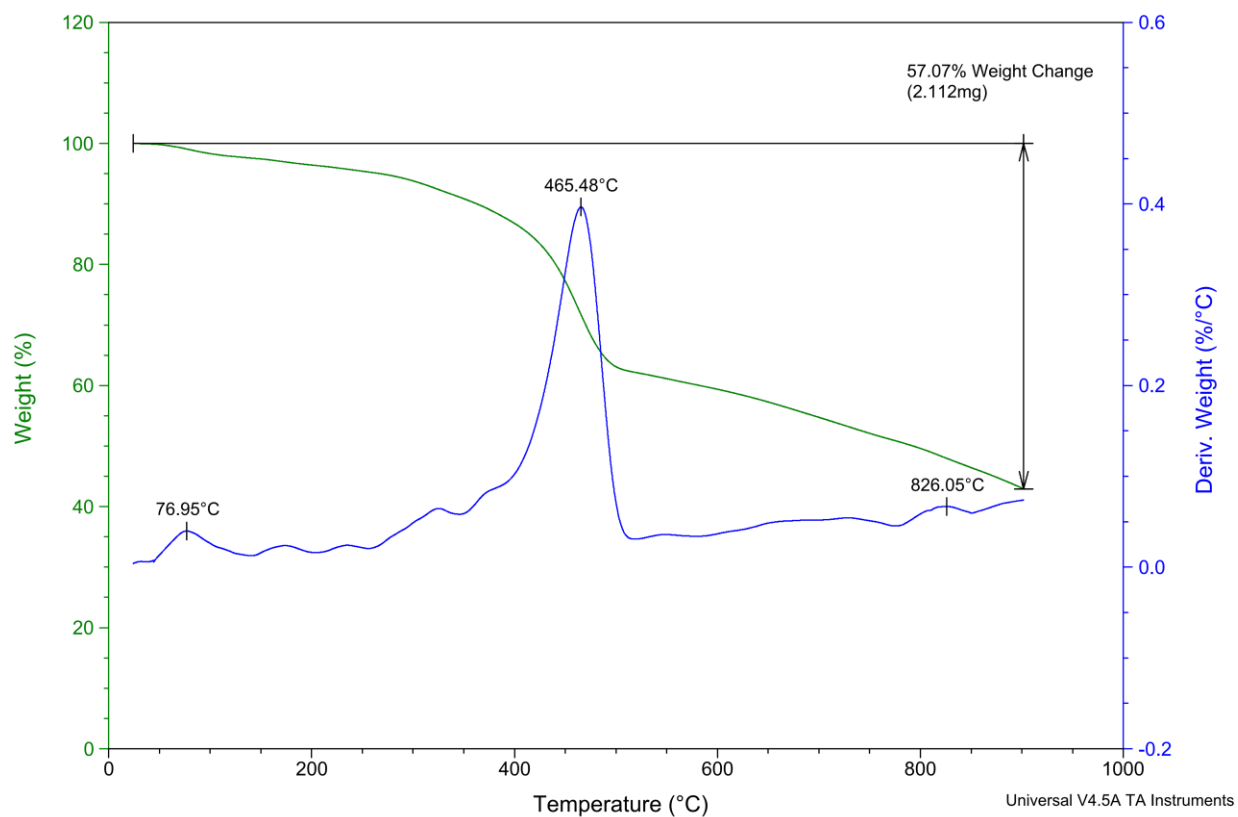

Figure S32. TGA thermogram of Mag@N1M3 sorbent

Sample: N1M1  
Size: 3.3120 mg  
Method: Dual Ramp  
Comment: 25-900@20-Air

File: C:\...\N1M1\N1M1.001  
Operator: Taban Lab  
Run Date: 05-Apr-2023 22:51  
Instrument: SDT Q600 V20.9 Build 20

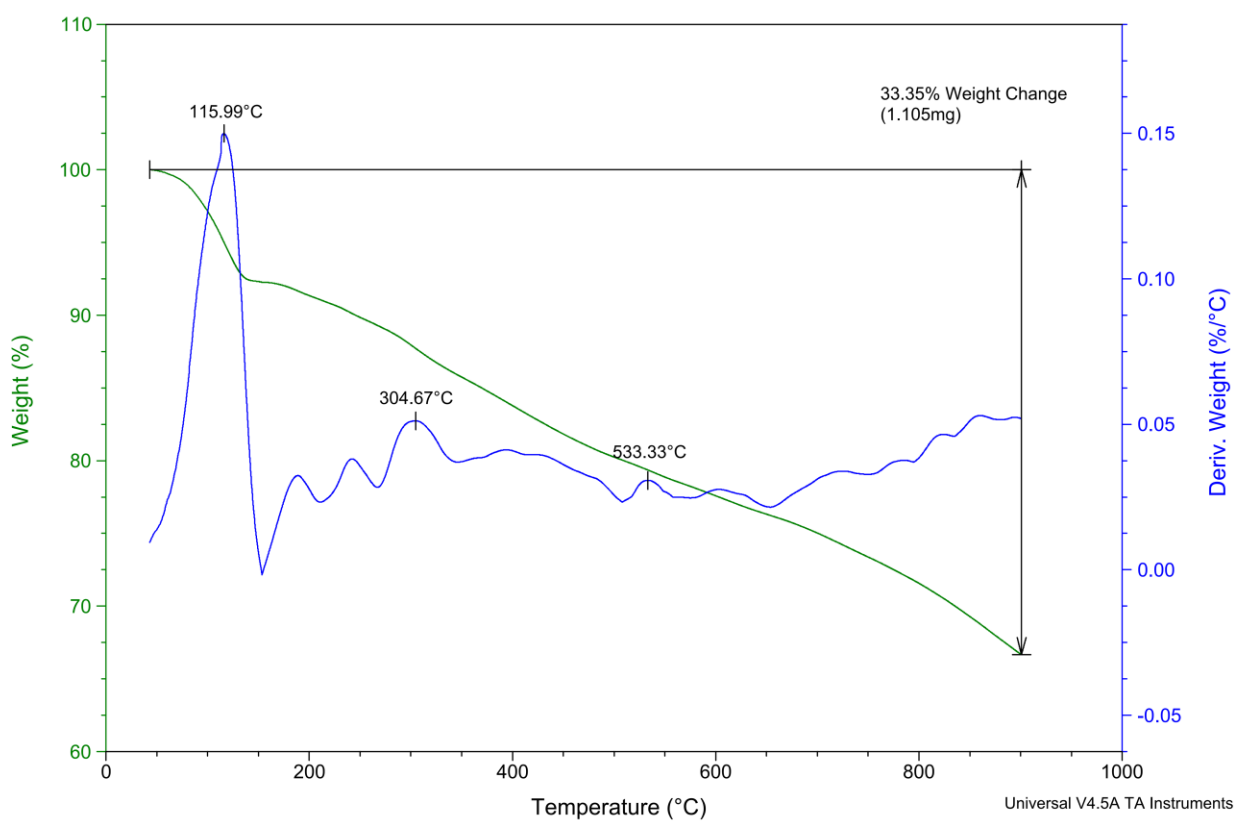

Figure S33. TGA thermogram of Mag@N1M1 sorbent

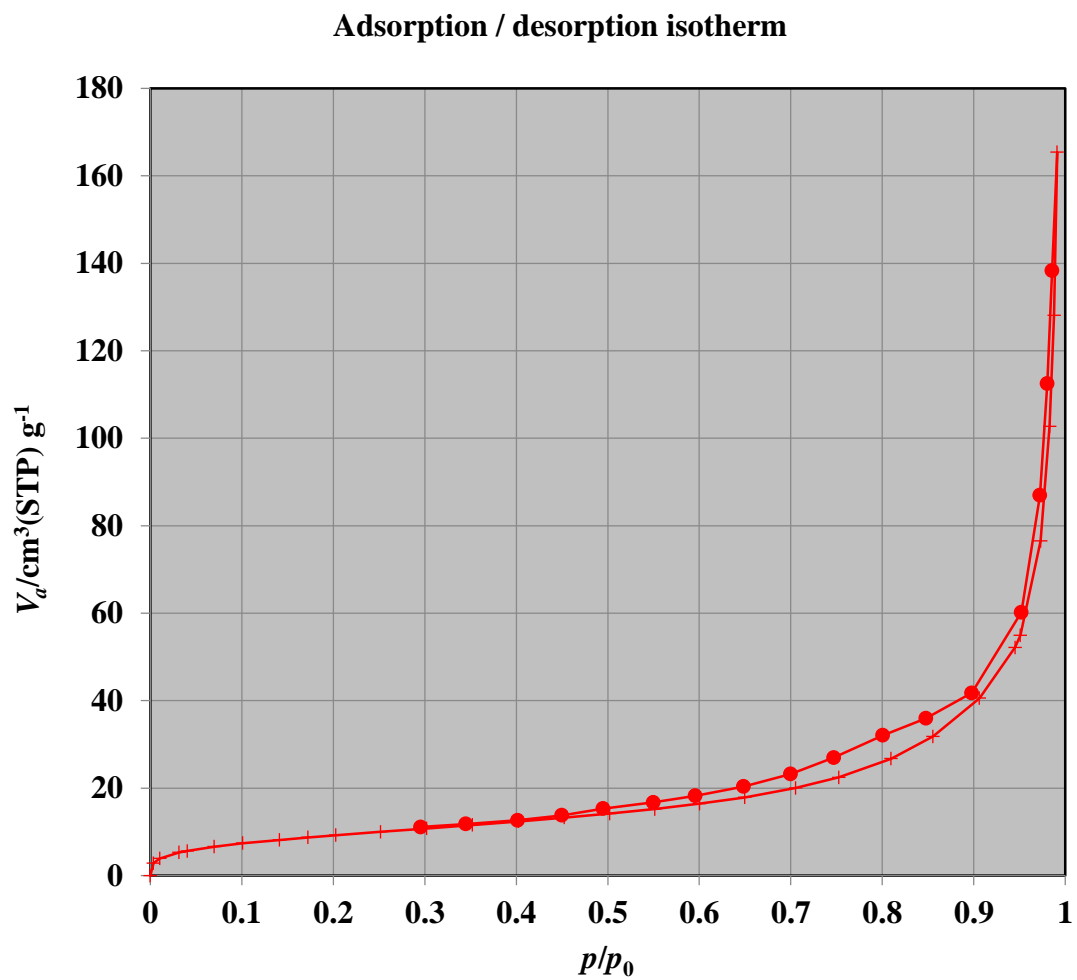

Figure S34.  $\text{N}_2$  adsorption-desorption isotherm of Mag@N1M3 sorbent

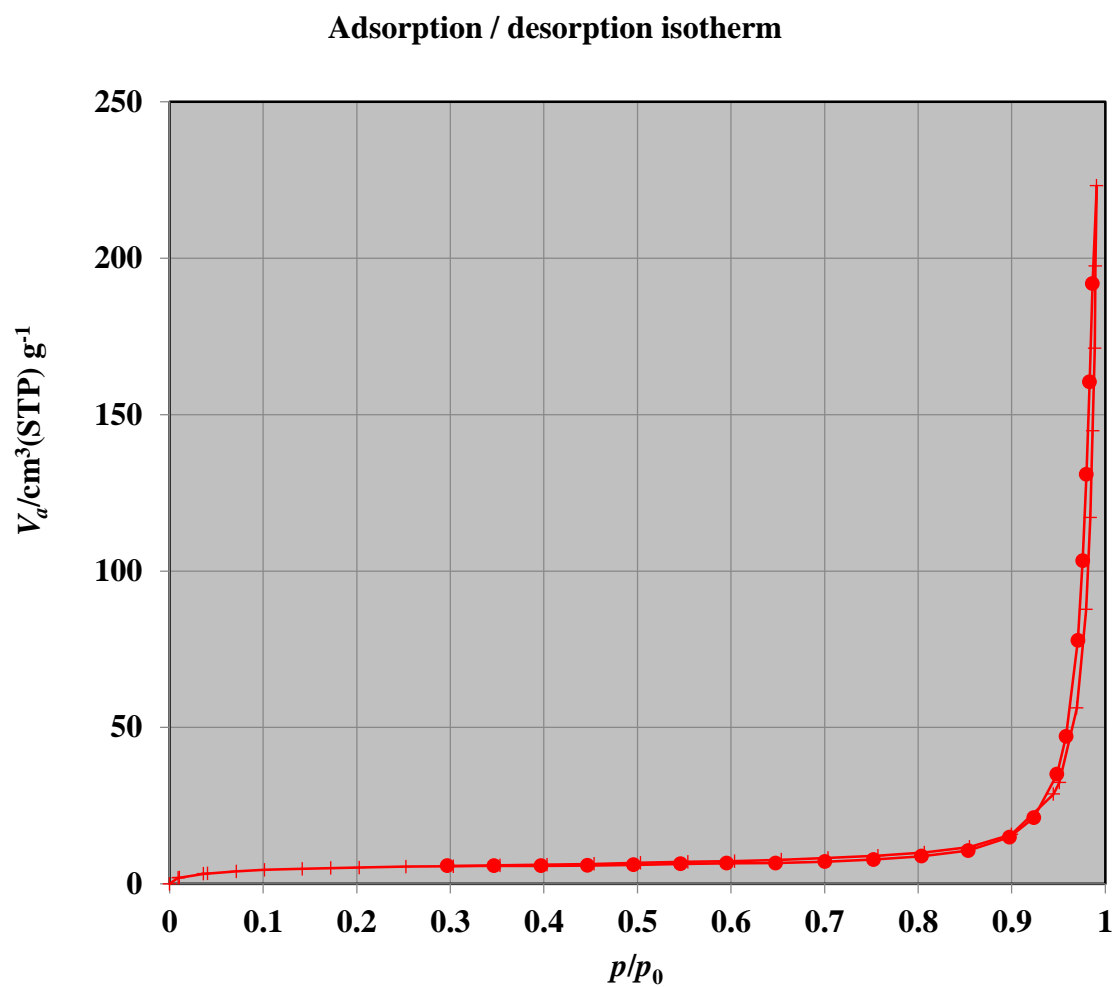

Figure S35. N<sub>2</sub> adsorption-desorption isotherm of Mag@N1M1 sorbent

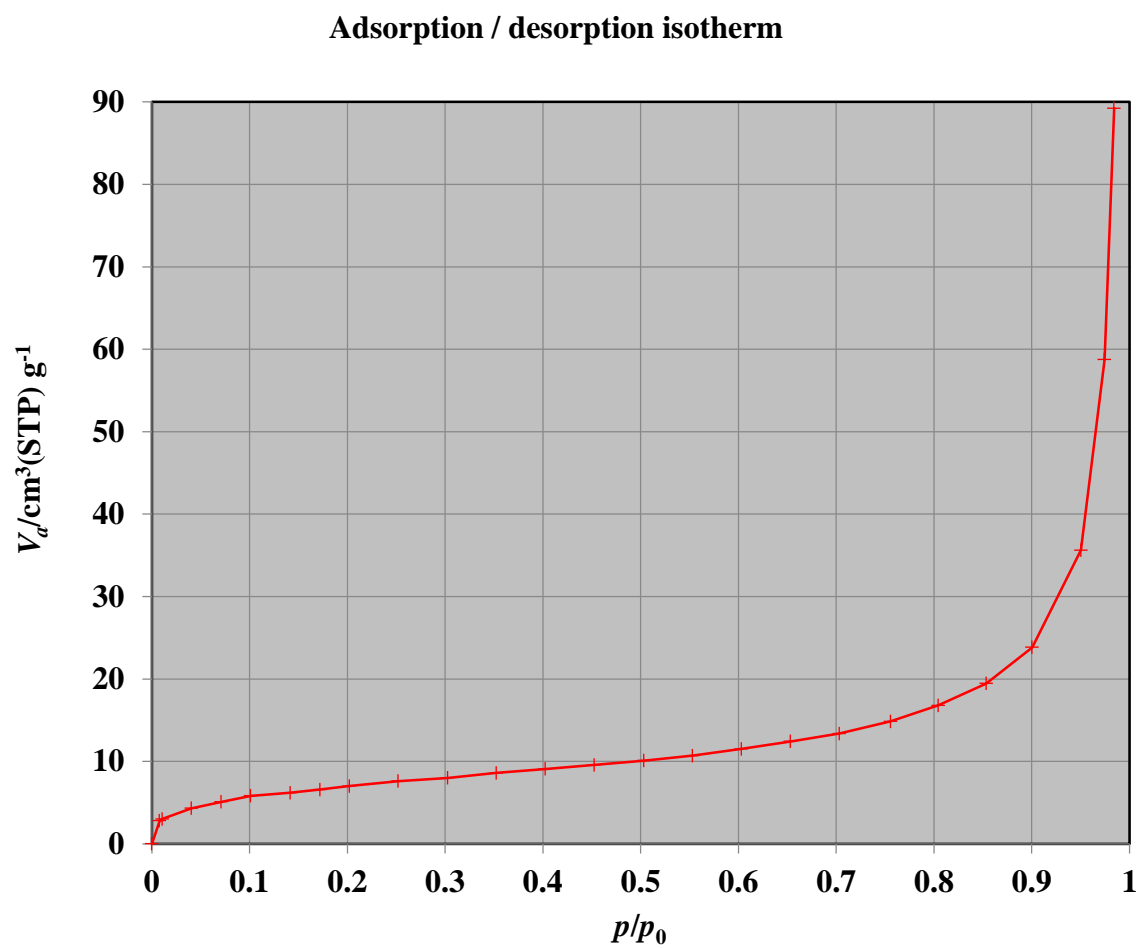

Figure S36.  $\text{N}_2$  adsorption-desorption isotherm of Mag@Me sorbent

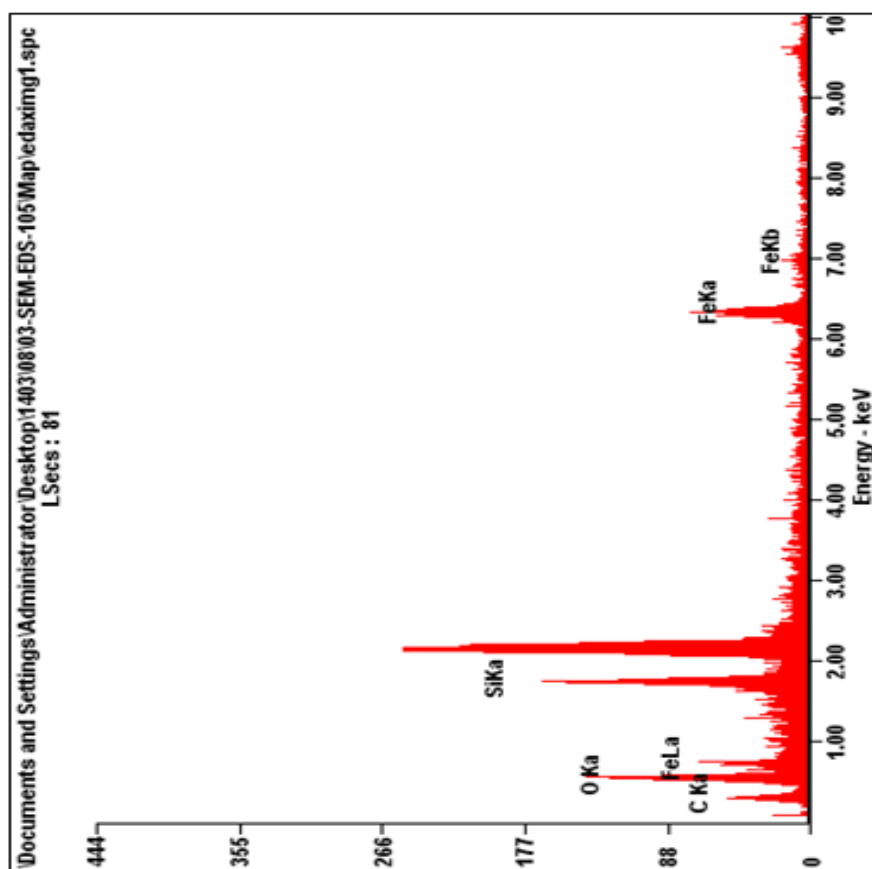

| Element | Wt%        | At%   |
|---------|------------|-------|
| CK      | 20.66      | 40.57 |
| OK      | 17.51      | 25.82 |
| SiK     | 17.99      | 15.11 |
| FeK     | 43.83      | 18.51 |
| Matrix  | Correction | ZAF   |

Figure S37. EDX spectrum, At% and Wt% of Mag@Me sorbent

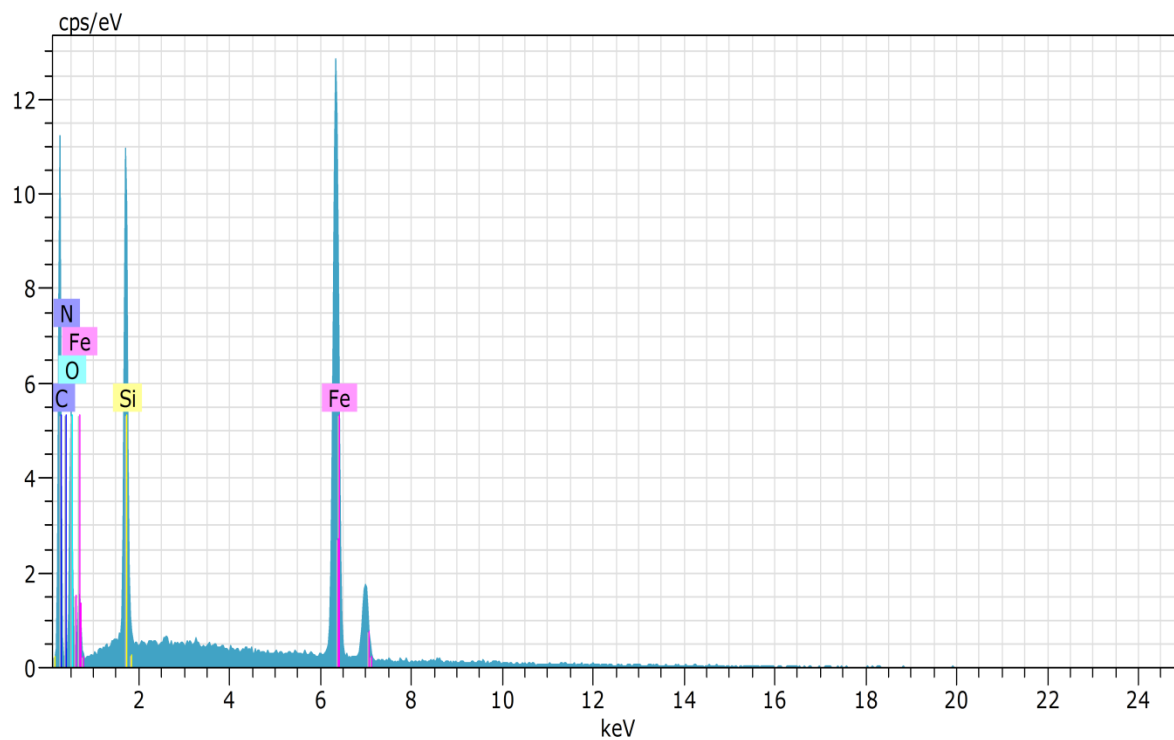

HV:25.0kV

Puls th.:9.08kcps

| El     | AN | Series   | unn. C<br>[wt.%] | norm. C<br>[wt.%] | Atom. C<br>[at.%] | Error (1 Sigma)<br>[wt.%] |
|--------|----|----------|------------------|-------------------|-------------------|---------------------------|
| C      | 6  | K-series | 46.10            | 47.88             | 64.00             | 6.84                      |
| O      | 8  | K-series | 22.83            | 23.71             | 23.79             | 3.83                      |
| Fe     | 26 | K-series | 19.35            | 20.10             | 5.78              | 0.54                      |
| Si     | 14 | K-series | 5.18             | 5.38              | 3.08              | 0.26                      |
| N      | 7  | K-series | 2.82             | 2.93              | 3.36              | 1.19                      |
| Total: |    |          | 96.28            | 100.00            | 100.00            |                           |

Figure S38. EDX spectrum, At% and Wt% of Mag@N1M3 sorbent

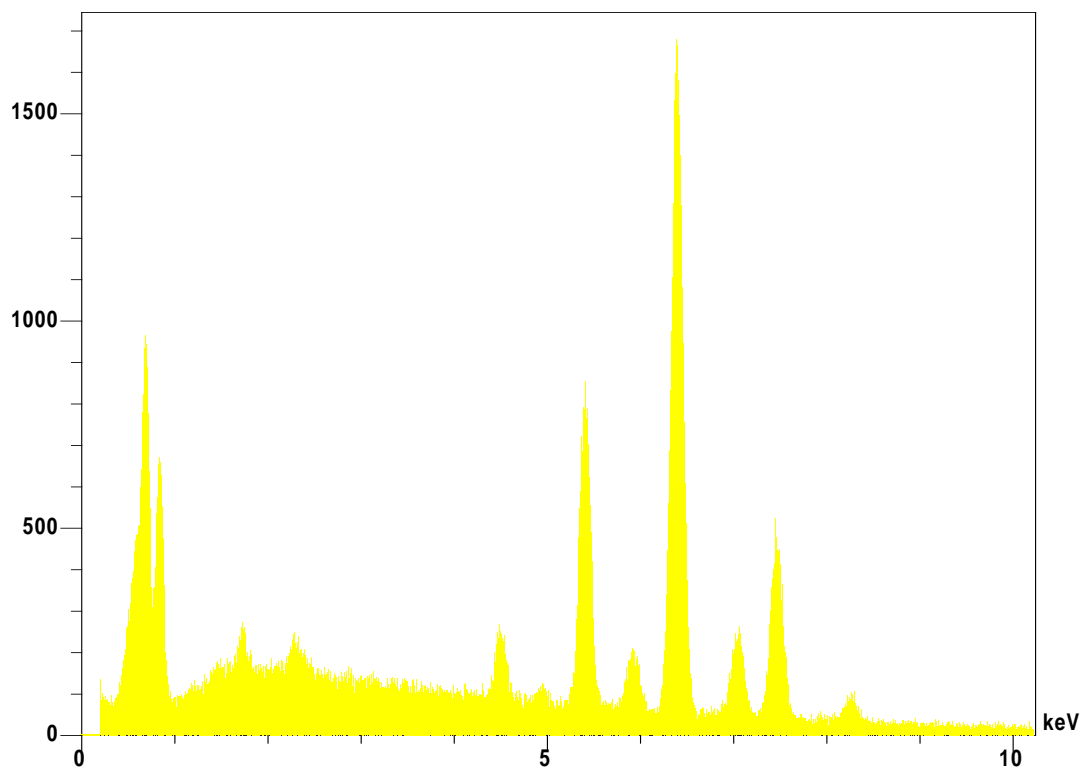

### Quantitative Results

| Elt       | Line | Int   | Error  | K      | Kr     | W%     | A%     | ZAF    | Pk/Bg  | LConf | HConf | Cat# |
|-----------|------|-------|--------|--------|--------|--------|--------|--------|--------|-------|-------|------|
| <b>C</b>  | Ka   | 25.2  | 7.4446 | 0.0797 | 0.0518 | 17.14  | 28.89  | 0.3023 | 112.64 | 15.89 | 18.38 | 0.00 |
| <b>N</b>  | Ka   | 3.6   | 7.4446 | 0.0114 | 0.0074 | 2.01   | 2.90   | 0.3707 | 7.76   | 1.62  | 2.39  | 0.00 |
| <b>O</b>  | Ka   | 89.0  | 7.4446 | 0.2866 | 0.1862 | 32.66  | 41.33  | 0.5702 | 142.87 | 31.40 | 33.92 | 0.00 |
| <b>Si</b> | Ka   | 101.8 | 6.4498 | 0.3535 | 0.2297 | 26.21  | 18.90  | 0.8762 | 44.92  | 25.27 | 27.16 | 0.00 |
| <b>Fe</b> | Ka   | 60.4  | 0.8086 | 0.2687 | 0.1746 | 21.98  | 7.97   | 0.7940 | 17.00  | 20.95 | 23.01 | 0.00 |
|           |      |       |        | 1.0000 | 0.6497 | 100.00 | 100.00 |        |        |       |       | 0.00 |

Figure S39. EDX spectrum, At% and Wt% of Mag@N1M1 sorbent

### General procedure for oil separation using magnetic sorbents

The procedure for evaluating the oil adsorption capacity of magnetic sorbents was accomplished based on weight measurement. The appropriate amount of magnetic sorbent nanoparticles (0.07-0.1 g) was weighed as  $m_1$ . 0.5 g of oil, denoted as  $m_2$  was mixed with 40 mL distilled water, and then magnetic sorbent was added to it. The oil was adsorbed by the magnetic sorbent during a few minutes (7 min, unless stated). Afterwards, the magnetic sorbent together with the adsorbed oil were collected by nearing an external magnetic bar to the reaction vessel. The collected particles were left for 24 h to evaporate any possible adsorbed water and then weighed as  $m_3$  (Refer to the SI for photos depicting the experimental section of oil separation). Finally, the sorption capacity ( $Q$ ) of nanoparticles was calculated by the following formula:

$$Q = \frac{m_3 - m_1}{m_2} \times 100$$

For the recovery test, magnetic sorbent nanoparticles were washed by acetone under ultrasonic irradiation (during 15 min) for three times to completely remove the adsorbed oil then collected with a magnetic bar and dried in oven at 50 °C for 2 h to remove residual acetone. Then it was reused to separate oil from water for the next runs. All experiments were repeated for 3 times and the average data was reported.

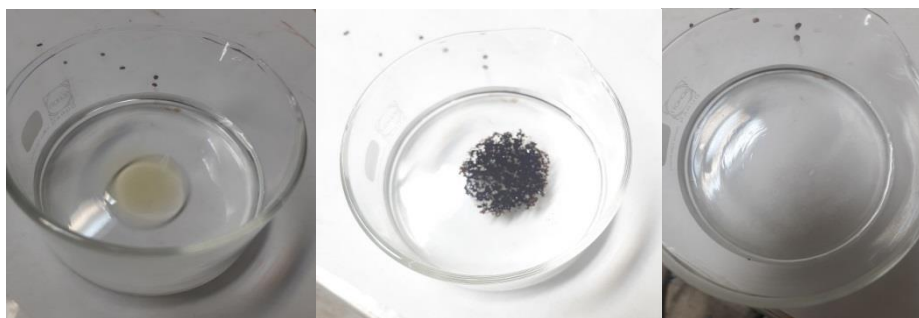

Figure S40. Photos of oil separation steps from water using Mag@N1M3 sorbent

### General procedure for separation of chromium (VI) from aqueous medium using magnetic sorbents

Initially, 2 and 5 mg/L aqueous solutions of chromium (VI) were prepared via dissolving of appropriate amounts of  $K_2Cr_2O_7$  in water. Then, 10 mL of light orange chromium (VI) solution was mixed with 0.05 g of each sorbent and stirred at room temperature using a shaker at 230 rpm

during appropriate time. After the process, magnetic sorbent was separated with an external magnet and the remained solution was subjected to the analysis with spectrophotometer. Spectrophotometric measurement at 540 nm, in the presence of 1,5-diphenylcarbazide as indicator, was employed for the determination of chromium ion concentration before and after treatment with sorbents. To do this, 1,5-diphenylcarbazide solution was prepared via dissolving 0.5 g 1,5-diphenylcarbazide in 100 mL acetone followed by addition of 0.5 mL H<sub>2</sub>SO<sub>4</sub> (0.5 N) to it. For the sample preparation, a 50 mL aqueous solution was prepared by mixing 5 mL of the chromium (VI) solutions (before or after treatment with sorbent) and 1 mL of 1,5-diphenylcarbazide solution. When these two are mixed in an acidic medium, a highly sensitive colorimetric reaction occurs. Chromium (VI) oxidizes 1,5-diphenylcarbazide to 1,5-diphenylcarbazone. Simultaneously, the chromium (VI) is reduced to chromium (III). The Cr (III) ions then immediately form a stable, soluble complex with the 1,5-diphenylcarbazone. This complex has an intense and characteristic violet color. Supernatants and standard solution of chromium ion were analyzed at 540 nm with the spectrophotometer. Finally, the removal efficiency was obtained using the following formula:

$$\text{Removal efficiency (\%)} = \frac{C_0 - C_f}{C_0} \times 100$$

In which,  $C_0$  and  $C_f$  are initial and final concentration of chromium (VI) based on mg/L, respectively.

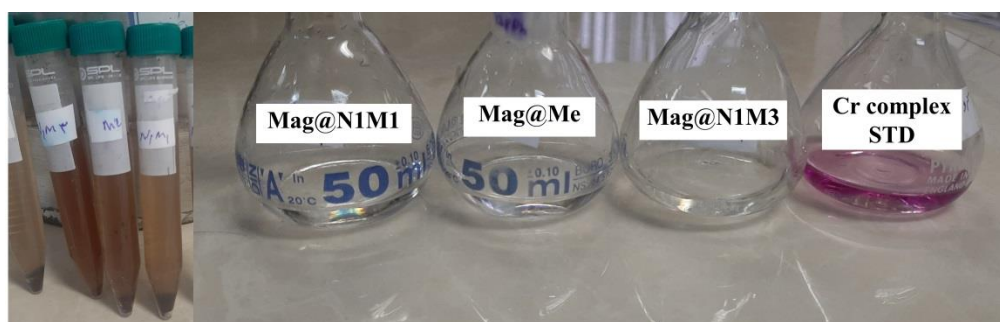

Figure S41. Photos of Cr (VI) separation from water using magnetic sorbents
